# Supplementary material for: Modeling the Probability of HIV Infection over Time in High-Risk Seronegative Participants Receiving Placebo in Five Randomized Double-Blind Placebo-Controlled HIV Pre-Exposure Prophylaxis Trials: A Patient-Level Pooled Analysis
Source: Pharmaceutics. 2022 Aug 27;14(9):1801. doi: 10.3390/pharmaceutics14091801 (PMC9504389; doi:10.3390/pharmaceutics14091801)
Supplement: Supplementary file 1 [file pharmaceutics-14-01801-s001.zip › pharmaceutics-1764582-supplementary.pdf]

## SUPPLEMENTAL MATERIAL

Modeling the probability of HIV infection over time in high-risk seronegative individuals receiving  
placebo in five HIV PrEP trials

Maria Garcia-Cremades, Craig W. Hendrix, Priya Jayachandran Natasha Strydom, Leah Jarlsberg, Robert Grant, Connie L. Celum, Michael Martin, Jared M. Baeten, Jeanne Marrazzo, Peter Anderson, Kachit Choopanya, Suphak Vanichseni, David V. Glidden, Radojka M. Savic

## TABLE OF CONTENTS

|                                                                                                 |           |
|-------------------------------------------------------------------------------------------------|-----------|
| <b>Supplemental Methods. Model building and evaluation .....</b>                                | <b>3</b>  |
| <b>Supplemental Table S1. Population characteristics and risk factors by studies.....</b>       | <b>5</b>  |
| Table S1.(a) Population characteristics and risk factors in iPrEx study.....                    | 5         |
| Table S1.(b) Population characteristics and risk factors in VOICE study .....                   | 8         |
| Table S1.(c) Population characteristics and risk factors in Partners PrEP study.....            | 11        |
| Table S1.(d) Population characteristics and risk factors in BTS study .....                     | 13        |
| Table S1.(e) Population characteristics and risk factors in TDF2 study .....                    | 15        |
| <b>Supplemental Material. Preliminary analysis .....</b>                                        | <b>16</b> |
| Figure S1. Kaplan Meier plots for HIV-free % for iPrEx' population characteristics .....        | 16        |
| Table S2. Univariate cox-regression analyses for iPrEx study.....                               | 17        |
| Figure S2. Kaplan Meier plots for HIV-free % for VOICE' population characteristics.....         | 19        |
| Table S3. Univariate cox-regression analyses for VOICE study. ....                              | 20        |
| Figure S3. Kaplan Meier plots for HIV-free % for Partners PrEP' population characteristics..... | 22        |
| Table S4. Univariate cox-regression analyses for Partners PrEP study. ....                      | 23        |

|                                                                                                                                                                        |    |
|------------------------------------------------------------------------------------------------------------------------------------------------------------------------|----|
| Figure S4. Kaplan Meier plots for HIV-free % for BTS' population characteristics.....                                                                                  | 24 |
| Table S5. Univariate cox-regression analyses for BTS study. ....                                                                                                       | 25 |
| Figure S5. Kaplan Meier plots for HIV-free % for TDF2' population characteristics.....                                                                                 | 27 |
| Table S6. Univariate cox-regression analyses for TDF2 study. ....                                                                                                      | 28 |
| <b>Supplementary Table S7.</b> Distribution of identified risk factors (low risk characteristics) among low, medium, and high-risk.....                                | 26 |
| <b>Supplemental Material. Additional Results.</b> Substantial differences in risk within each population. Detailed description of model predictors in each study. .... | 30 |
| <b>Supplemental Figure S6.</b> Interactive web application .....                                                                                                       | 32 |
| <b>Supplemental Material. Additional Discussion.</b> Comparison of the parametric models developed in this work with prior risk assessments tools. ....                | 30 |
| <b>Supplemental Material. NONMEM control stream files for the studies</b> .....                                                                                        | 32 |

## Supplemental Methods.

### Model building and evaluation

A parametric time-to-event approach was used to describe time to HIV infection. Different distributions (exponential, Gompertz and Weibull) were explored to characterize the hazard distribution and to select the best baseline survival model. Selection was based on the (i) minimum value of the objective function value (OFV) provided by NONMEM, which is approximately equal to  $-2 \log(\text{likelihood})$  ( $-2LL$ ) where a decrease in  $-2LL$  of 3.84, 6.63 and 10.83 points between two nested models is considered significant at  $p$  values of 0.05, 0.01 and 0.001, respectively, (ii) visual exploratory analysis of predictive checks [20,21] (VPC) and (iii) meaningfulness of the parameter estimates with precision (relative standard errors (RSE)). Once the baseline survival model was selected and evaluated, a covariate analysis was performed to identify predictors ( $p < 0.05$ ) that increased the risk of HIV infection. These predictors could be individual demographic characteristics, risk behaviors, or sexual transmitted infection (STI) history. The covariate identification analysis was performed by stepwise covariate modelling (SCM) implemented in the PsN software [35] by means of the  $-2LL$  ratio test with significance level of 0.01 for the forward inclusion and 0.001 for backward deletion approaches. Raw data representation by Kaplan Meier plots were also done in this step to identify potentially significant predictors. Covariates included in the final model were selected with consideration for scientific plausibility, statistical significance and clinical relevance. Selected covariates were included following the general covariate model described in the following equation  $TVP =$

$$\theta_n \times \prod_1^m \left( \frac{cov_m}{cov_{m,ref}} \right)^{\theta_m} \times \prod_1^p \theta_{p,ctg}.$$
 TVP represents the typical value of a model parameter and is described as a function of  $m$  continuous ( $cov_m$ ) and  $p$  categorical covariates. For each  $p$  covariate,  $\theta_{p,ctg}$  takes the value of 1 for one of the categories (ctg), usually the most common within the studied population, and for the rest of the categories, the corresponding parameter estimates.  $\theta_n$  describes the  $n^{th}$  typical parameter value for an individual with covariate values ( $cov_m$ ) equal to the reference values:  $[(cov_m = cov_{m,ref}) \text{ and } (\theta_{p,ctg} = 1)]$ .  $cov_{m,ref}$  refers to the median value across the populations studied.  $\theta_m$  is the parameter quantifying the magnitude of the continuous covariate-parameter relationship. Median covariate values

were imputed for missing continuous covariates while categorical missing covariates adopted the most prevalent value of their corresponding population. Potential correlations between covariates were explored through scatter plots and a correlation coefficient calculation. If two highly correlated covariates ( $>80\%$ ) were found, the most significant covariate, in terms of statistical and clinical importance, was chosen and incorporated into the model. If two moderately correlated covariates ( $>30\%$  and  $<80\%$ ) were found, both were kept in the model in case they showed equivalent significance, provided the evaluation of the final model supported it.

# Supplemental Table S1. Population characteristics and risk factors by studies

Table S1.(a) Population characteristics and risk factors in iPrEx study

| <b>iPrEx</b>                                    |                  |
|-------------------------------------------------|------------------|
| <b>Population</b> – No. (total)                 |                  |
| MSM/TGW                                         | 1218             |
| <b>Demographics</b>                             |                  |
| Sex at birth                                    |                  |
| Male – No. (%)                                  | 1218 (100%)      |
| Female – No. (%)                                | 0 (0%)           |
| Ethnicity                                       |                  |
| Mixed other – No. (%)                           | 857 (70%)        |
| Black/African American – No. (%)                | 93 (8%)          |
| White – No. (%)                                 | 201 (17%)        |
| Asian – No. (%)                                 | 67 (5%)          |
| Country                                         |                  |
| Brazil– No. (%)                                 | 178 (15%)        |
| Peru– No. (%)                                   | 688 (56%)        |
| Ecuador – No. (%)                               | 144 (12%)        |
| USA– No. (%)                                    | 113 (9%)         |
| South Africa – No. (%)                          | 39 (3%)          |
| Thailand – No. (%)                              | 56 (5%)          |
| Study site (Location)                           |                  |
| Praca Onze (Brazil) – No. (%)                   | 44 (4%)          |
| USP, Sao Paulo (Brazil) – No. (%)               | 36 (3%)          |
| Fiocruz (Brazil) – No. (%)                      | 98 (8%)          |
| INMENSA, Lima (Peru) – No. (%)                  | 244 (20%)        |
| ACSA, Iquitos (Peru) – No. (%)                  | 227 (19%)        |
| Equidad (Ecuador)– No. (%)                      | 144 (12%)        |
| SFDPH, San Francisco (USA) – No. (%)            | 70 (6%)          |
| Fenway Community Health, Boston (USA) – No. (%) | 43 (3%)          |
| Cape Town (South Africa) – No. (%)              | 56 (4%)          |
| Chiang Mai (Thailand) – No. (%)                 | 217 (18%)        |
| IMPACTA, Lima (Peru) – No. (%)                  |                  |
| Age (yr)                                        |                  |
| Median (min-max)                                | 24 (18-64)       |
| Education                                       |                  |
| Less than Secondary – No. (%)                   | 236 (19%)        |
| Completed Secondary – No. (%)                   | 443 (36%)        |
| Post-Secondary – No. (%)                        | 529 (43%)        |
| NA – No. (%)                                    | 10 (1%)          |
| Transsexuality                                  |                  |
| Yes – No. (%)                                   | 158 (13%)        |
| No – No. (%)                                    | 1060 (87%)       |
| Marital status                                  |                  |
| Single – No. (%)                                | 917 (75%)        |
| With Partner (Not married) – No. (%)            | 268 (22%)        |
| Divorced/Separated – No. (%)                    | 15 (1%)          |
| Married – No. (%)                               | 16 (1%)          |
| Widow – No. (%)                                 | 2 (<1%)          |
| Weight (Kg)                                     |                  |
| Median (min-max)                                | 65.5 (42-177.86) |
| Latino Ethnicity                                |                  |
| Yes – No. (%)                                   | 336 (28%)        |
| No – No. (%)                                    | 882 (72%)        |

|                             |            |
|-----------------------------|------------|
| Partner report HIV infected |            |
| Yes – No. (%)               | 31 (3%)    |
| No – No. (%)                | 1187 (97%) |

#### **Sexual Transmitted Infections**

|                              |           |
|------------------------------|-----------|
| HSV2 (herpes simple virus 2) |           |
| Negative – No. (%)           | 31 (2%)   |
| Positive – No. (%)           | 421 (35%) |
| NA – No. (%)                 | 766 (63%) |

|                                |            |
|--------------------------------|------------|
| Urine Luciferase Enzyme Result |            |
| Negative – No. (%)             | 0 (0%)     |
| Positive 1 – No. (%)           | 1194 (98%) |
| Positive 2 – No. (%)           | 14 (1%)    |
| Positive 3 – No. (%)           | 6 (<1%)    |
| Positive 4 – No. (%)           | 3 (<1%)    |
| NA – No. (%)                   | 1 (<1%)    |

|                    |            |
|--------------------|------------|
| Gonorrhea PCR test |            |
| Negative – No. (%) | 18 (1%)    |
| Positive – No. (%) | 5 (<1%)    |
| NA – No. (%)       | 1195 (98%) |

|                    |            |
|--------------------|------------|
| Chlamydia PCR test |            |
| Negative – No. (%) | 15 (1%)    |
| Positive – No. (%) | 8 (<1%)    |
| NA – No. (%)       | 1195 (98%) |

|                    |            |
|--------------------|------------|
| Syphilis RPR test  |            |
| Negative – No. (%) | 1040 (85%) |
| Positive – No. (%) | 178 (15%)  |

#### **Risk behavior**

|                               |           |
|-------------------------------|-----------|
| Total number of male partners |           |
| Median (min-max)              | 6 (0-600) |

|                                                                      |           |
|----------------------------------------------------------------------|-----------|
| Total number of anal sex partners in the 3 months prior to screening |           |
| Median (min-max)                                                     | 6 (0-600) |

|                                                         |           |
|---------------------------------------------------------|-----------|
| Total number of insertive partners in the past 3 months |           |
| Median (min-max)                                        | 2 (0-600) |

|                                                         |           |
|---------------------------------------------------------|-----------|
| Total number of receptive partners in the past 3 months |           |
| Median (min-max)                                        | 3 (0-600) |

|                                                |           |
|------------------------------------------------|-----------|
| Number of non-condomed receptive anal partners |           |
| Median (min-max)                               | 1 (0-300) |

|                                               |           |
|-----------------------------------------------|-----------|
| Number of non-condomed insertive anal partner |           |
| Median (min-max)                              | 1 (0-102) |

|                                                                          |           |
|--------------------------------------------------------------------------|-----------|
| Non-condom receptive anal intercourse in the 3 months prior to screening |           |
| Yes – No. (%)                                                            | 734 (60%) |
| No – No. (%)                                                             | 484 (40%) |

|                                                  |           |
|--------------------------------------------------|-----------|
| Total number of condomed receptive anal partners |           |
| Median (min-max)                                 | 1 (0-300) |

|                                                  |           |
|--------------------------------------------------|-----------|
| Total number of condomed insertive anal partners |           |
| Median (min-max)                                 | 0 (0-600) |

|                                     |           |
|-------------------------------------|-----------|
| Total number of non-condom partners |           |
| Median (min-max)                    | 2 (0-300) |

|                                 |           |
|---------------------------------|-----------|
| Total number of condom partners |           |
| Median (min-max)                | 3 (0-600) |

|                                |           |
|--------------------------------|-----------|
| Proportion non-condom partners |           |
| Median (min-max)               | 0.5 (0-2) |

---

No.: Total number of individuals at each group. NA: Information not available.

Table S1.(b) Population characteristics and risk factors in VOICE study

| <b>VOICE</b>                         |             |
|--------------------------------------|-------------|
| <b>Population – No. (total)</b>      | 2008        |
| Young women at high risk             |             |
| Type of placebo                      |             |
| Oral – No. (%)                       | 1008 (50%)  |
| Vaginal – No. (%)                    | 1000 (50%)  |
| <b>Demographics</b>                  |             |
| Sex at birth                         |             |
| Male – No. (%)                       | 0 (0%)      |
| Female – No. (%)                     | 2008 (100%) |
| Ethnicity                            |             |
| Mixed other – No. (%)                | 48 (2%)     |
| Black/African American – No. (%)     | 1960 (98%)  |
| Country                              |             |
| Zimbabwe– No. (%)                    | 252 (13%)   |
| South Africa – No. (%)               | 1627 (81%)  |
| Uganda – No. (%)                     | 129 (6%)    |
| Study site (Location)                |             |
| Seke South (Zimbabwe) – No. (%)      | 86 (4%)     |
| Spilhaus (Zimbabwe) – No. (%)        | 82 (4%)     |
| Zengeza (Zimbabwe) – No. (%)         | 84 (4%)     |
| Kampala (Uganda) – No. (%)           | 129 (7%)    |
| Aurum (South Africa) – No. (%)       | 104 (5%)    |
| Bothas Hill (South Africa) – No. (%) | 151 (8%)    |
| eThekweni (South Africa) – No. (%)   | 144 (7%)    |
| Isipingo (South Africa) – No. (%)    | 181 (9%)    |
| Overport (South Africa) – No. (%)    | 98 (5%)     |
| R.K. Khan (South Africa) – No. (%)   | 167 (8%)    |
| Soweto MTN (South Africa) – No. (%)  | 140 (7%)    |
| Tongaat (South Africa) – No. (%)     | 175 (9%)    |
| Umkomaas (South Africa) – No. (%)    | 146 (7%)    |
| Verulam (South Africa) – No. (%)     | 180 (9%)    |
| WRHI (South Africa) – No. (%)        | 141 (7%)    |
| Age (yr)                             |             |
| Median (min-max)                     | 24 (18-40)  |
| Education                            |             |
| Less than Secondary – No. (%)        | 936 (47%)   |
| Completed Secondary – No. (%)        | 901 (45%)   |
| Post-Secondary – No. (%)             | 170 (8%)    |
| NA – No. (%)                         | 1 (<1%)     |
| Marital status                       |             |
| Single – No. (%)                     | 1582 (79%)  |
| Married – No. (%)                    | 426 (21%)   |
| Weight (Kg)                          |             |
| Median (min-max)                     | 67 (36-157) |
| Partner circumcised                  |             |
| Yes – No. (%)                        | 639 (32%)   |
| No – No. (%)                         | 1112 (55%)  |
| Do not know- No. (%)                 | 242 (12%)   |
| NA– No. (%)                          | 15 (1%)     |
| Primary partner report HIV infected  |             |
| Yes – No. (%)                        | 63 (3%)     |
| No – No. (%)                         | 1243 (62%)  |
| NA– No. (%)                          | 702 (35%)   |

|                                                |            |
|------------------------------------------------|------------|
| Partner provides financial support             |            |
| Yes – No. (%)                                  | 1646 (82%) |
| No – No. (%)                                   | 348 (17%)  |
| NA – No. (%)                                   | 14 (1%)    |
| Number of live birth                           |            |
| Median (min-max)                               | 1 (0-9)    |
| Alcohol use                                    |            |
| Never – No. (%)                                | 1461 (73%) |
| <=1x/wk – No. (%)                              | 455 (23%)  |
| 2-6x/wk – No. (%)                              | 67 (3%)    |
| Daily – No. (%)                                | 11 (1%)    |
| NA – No. (%)                                   | 15 (1%)    |
| <b><u>Sexual Transmitted Infections</u></b>    |            |
| HSV2 (herpes simplex virus 2)                  |            |
| Negative – No. (%)                             | 1082 (54%) |
| Positive – No. (%)                             | 918 (46%)  |
| NA – No. (%)                                   | 8 (<1%)    |
| HSV1 (herpes simplex virus 1)                  |            |
| Negative – No. (%)                             | 86 (4%)    |
| Positive – No. (%)                             | 1914 (96%) |
| NA – No. (%)                                   | 8 (<1%)    |
| Trichomonas test                               |            |
| Negative – No. (%)                             | 1890 (94%) |
| Positive – No. (%)                             | 115 (6%)   |
| NA – No. (%)                                   | 3 (<1%)    |
| Gonorrhea                                      |            |
| Negative – No. (%)                             | 1939 (97%) |
| Positive – No. (%)                             | 69 (3%)    |
| Chlamydia                                      |            |
| Negative – No. (%)                             | 1753 (83%) |
| Positive – No. (%)                             | 255 (13%)  |
| Syphilis                                       |            |
| Negative – No. (%)                             | 1981 (99%) |
| Positive – No. (%)                             | 27 (1%)    |
| <b><u>Risk behavior</u></b>                    |            |
| Vaginal sex past 4 weeks                       |            |
| Yes – No. (%)                                  | 1802 (90%) |
| No – No. (%)                                   | 204 (10%)  |
| NA – No. (%)                                   | 2 (<1%)    |
| Used of condom last vaginal sex                |            |
| Yes – No. (%)                                  | 1470 (73%) |
| No – No. (%)                                   | 278 (14%)  |
| NA – No. (%)                                   | 260 (13%)  |
| Total number of vaginal sex in the past 7 days |            |
| Median (min-max)                               | 2 (0-30)   |
| NA – No. (%)                                   | 205 (10%)  |
| Type of condom used last vaginal sex           |            |
| Male – No. (%)                                 | 1237 (62%) |
| Female – No. (%)                               | 43 (2%)    |
| NA – No. (%)                                   | 728 (36%)  |
| Condom used last vaginal sex broke             |            |
| Yes – No. (%)                                  | 52 (2%)    |
| No – No. (%)                                   | 1159 (58%) |
| NA – No. (%)                                   | 797 (40%)  |

|                                                                                   |                 |
|-----------------------------------------------------------------------------------|-----------------|
| Condom used last vaginal sex put on after penile penetration                      |                 |
| Yes – No. (%)                                                                     | 131 (6%)        |
| No – No. (%)                                                                      | 1036 (52%)      |
| NA – No. (%)                                                                      | 841 (42%)       |
| Condom used last vaginal sex taken off before ejaculation                         |                 |
| Yes – No. (%)                                                                     | 268 (13%)       |
| No – No. (%)                                                                      | 908 (45%)       |
| NA – No. (%)                                                                      | 832 (42%)       |
| Male condom used during last act of anal sex                                      |                 |
| Yes – No. (%)                                                                     | 248 (12%)       |
| No – No. (%)                                                                      | 112 (6%)        |
| NA – No. (%)                                                                      | 1648 (82%)      |
| Primary sex partner has sex with another partner in the past 3 months             |                 |
| Yes – No. (%)                                                                     | 231 (11%)       |
| No – No. (%)                                                                      | 478 (24%)       |
| NA – No. (%)                                                                      | 1299 (65%)      |
| Vaginal sex with primary sex partner in the past 3 months                         |                 |
| Yes – No. (%)                                                                     | 1813 (90%)      |
| No – No. (%)                                                                      | 133 (7%)        |
| NA – No. (%)                                                                      | 62 (3%)         |
| Total number of vaginal sex with condom in the past 7 days                        |                 |
| Median (min-max)                                                                  | 2 (0-30)        |
| NA – No. (%)                                                                      | 592 (30%)       |
| Percentage of condom use in vaginal sex in the past 7 days                        |                 |
| Median (min-max) %                                                                | 100 (14.29-100) |
| NA – No. (%)                                                                      | 860 (43%)       |
| Total number of sex partners, excluding primary sex partner, in the past 3 months |                 |
| Median (min-max)                                                                  | 0 (0-49)        |
| NA – No. (%)                                                                      | 22 (1%)         |
| Total number of anal sex in the past 3 months                                     |                 |
| Median (min-max)                                                                  | 0 (0-7)         |
| NA – No. (%)                                                                      | 29 (1%)         |

---

No.: Total number of individuals at each group. NA: Information not available.

Table S1.(c) Population characteristics and risk factors in Partners PrEP study

| <b>Partners PrEP</b>                                            |  |                |
|-----------------------------------------------------------------|--|----------------|
| Population – No. (total)                                        |  |                |
| HIV negative partner in HIV-serodiscordant heterosexual couples |  | 1574           |
| <b><u>Demographics</u></b>                                      |  |                |
| Sex at birth                                                    |  |                |
| Male – No. (%)                                                  |  | 953 (61%)      |
| Female – No. (%)                                                |  | 621 (39%)      |
| Country                                                         |  |                |
| Kenya– No. (%)                                                  |  | 691 (44%)      |
| Uganda– No. (%)                                                 |  | 883 (56%)      |
| Study site (Location)                                           |  |                |
| Tororo (Uganda) – No. (%)                                       |  | 213 (14%)      |
| Nairobi (Kenya)– No. (%)                                        |  | 160 (10%)      |
| Mbale (Uganda) – No. (%)                                        |  | 201 (13%)      |
| Thika (Kenya) – No. (%)                                         |  | 162 (10%)      |
| Kampala (Uganda) – No. (%)                                      |  | 193 (12%)      |
| Kabwohe (Uganda) – No. (%)                                      |  | 175 (11%)      |
| Kisumu (Kenya) – No. (%)                                        |  | 207 (13%)      |
| Eldoret (Kenya) – No. (%)                                       |  | 162 (10%)      |
| Jinja (Uganda) – No. (%)                                        |  | 101 (6%)       |
| Age (yr)                                                        |  |                |
| Median (min-max)                                                |  | 34 (17-64)     |
| Education (years of education at enrollment)                    |  |                |
| Median (min-max)                                                |  | 7 (0-19)       |
| Marital status                                                  |  |                |
| Not married – No. (%)                                           |  | 21 (1%)        |
| Married – No. (%)                                               |  | 1553 (99%)     |
| Weight (Kg)                                                     |  |                |
| Median (min-max)                                                |  | 60 (39-164)    |
| Male circumcised (men only)                                     |  |                |
| Yes – No. (%)                                                   |  | 504 (53%)      |
| No – No. (%)                                                    |  | 449 (47%)      |
| Currently pregnant (women only)                                 |  |                |
| Yes – No. (%)                                                   |  | 8 (1%)         |
| No – No. (%)                                                    |  | 613 (99%)      |
| Any monthly income                                              |  |                |
| Yes – No. (%)                                                   |  | 1250 (79%)     |
| No – No. (%)                                                    |  | 324 (21%)      |
| Number of children                                              |  |                |
| Median (min-max)                                                |  | 3 (0-21)       |
| Viral load (from HIV infected partner)                          |  |                |
| Median (min-max)                                                |  | 0 (0-20000000) |
| NA – No. (%)                                                    |  | 1558           |
| Viral load detectable (from HIV infected partner)               |  |                |
| Yes – No. (%)                                                   |  | 6 (<1%)        |
| No – No. (%)                                                    |  | 6 (<1%)        |
| NA – No. (%)                                                    |  | 1562 (99%)     |
| Viral load quantifiable (from HIV infected partner)             |  |                |
| Yes – No. (%)                                                   |  | 6 (<1%)        |
| No – No. (%)                                                    |  | 10 (1%)        |
| NA – No. (%)                                                    |  | 1558 (99%)     |
| <b><u>Sexual Transmitted Infections</u></b>                     |  |                |

|                              |            |
|------------------------------|------------|
| HSV2 (herpes simple virus 2) |            |
| Negative – No. (%)           | 478 (30%)  |
| Positive – No. (%)           | 1005 (64%) |
| NA – No. (%)                 | 91 (6%)    |
| Trichomonas test             |            |
| Negative – No. (%)           | 1453 (92%) |
| Positive – No. (%)           | 85 (6%)    |
| NA – No. (%)                 | 36 (2%)    |
| Gonorrhea                    |            |
| Negative – No. (%)           | 1488 (95%) |
| Positive – No. (%)           | 21 (1%)    |
| NA – No. (%)                 | 65 (4%)    |
| Chlamydia                    |            |
| Negative – No. (%)           | 1483 (94%) |
| Positive – No. (%)           | 25 (2%)    |
| NA – No. (%)                 | 66 (4%)    |
| Syphilis                     |            |
| Negative – No. (%)           | 1500 (95%) |
| Positive – No. (%)           | 62 (4%)    |
| NA – No. (%)                 | 12 (1%)    |

#### **Risk behavior**

|                                                                    |            |
|--------------------------------------------------------------------|------------|
| Number of times had sex with study partner in the last month       |            |
| Median (min-max)                                                   | 4 (0-42)   |
| Number of times used condoms with study partner in the last month  |            |
| Median (min-max)                                                   | 3 (0-42)   |
| NA – No. (%)                                                       | 59 (4%)    |
| Number of sexual partners besides study partner in last month      |            |
| Median (min-max)                                                   | 0 (0-4)    |
| Number of times had sex with other partners in the last month      |            |
| Median (min-max)                                                   | 4 (1-20)   |
| NA – No. (%)                                                       | 1454 (92%) |
| Number of times used condoms with other partners in the last month |            |
| Median (min-max)                                                   | 0 (0-20)   |
| NA – No. (%)                                                       | 1454 (92%) |

---

No.: Total number of individuals at each group. NA: Information not available.

Table S1.(d) Population characteristics and risk factors in BTS study

| <b>BTS</b>                                           |               |
|------------------------------------------------------|---------------|
| Population – No. (total)                             |               |
| <i>People who inject drugs</i>                       | 177           |
| <b><u>Demographics</u></b>                           |               |
| Sex at birth                                         |               |
| Male – No. (%)                                       | 156 (88%)     |
| Female – No. (%)                                     | 21 (12%)      |
| Country                                              |               |
| Thailand– No. (%)                                    | 177 (100%)    |
| Study site (Location)                                |               |
| Si Phraya, Bangkok (Thailand) – No. (%)              | 39 (22%)      |
| Urbchit, Bangkok (Thailand)– No. (%)                 | 1 (<1%)       |
| Bang Sue, Bangkok (Thailand) – No. (%)               | 2 (1%)        |
| Din Daeng, Bangkok (Thailand) – No. (%)              | 2 (1%)        |
| Wat Thadthong, Bangkok (Thailand) – No. (%)          | 1 (<1%)       |
| Boonmi, Bangkok (Thailand) – No. (%)                 | 5 (3%)        |
| Wat Pak Boae, Bangkok (Thailand) – No. (%)           | 1 (<1%)       |
| Prachathipatai, Bangkok (Thailand) – No. (%)         | 40 (23%)      |
| Ladphrao, Bangkok (Thailand) – No. (%)               | 38 (21%)      |
| Wongsawang, Bangkok (Thailand) – No. (%)             | 1 (<1%)       |
| Bangkae, Bangkok (Thailand) – No. (%)                | 2 (1%)        |
| Khlong Toey, Bangkok (Thailand) – No. (%)            | 5 (3%)        |
| Wat Paiton, Bangkok (Thailand) – No. (%)             | 1 (1%)        |
| Vajira, Bangkok (Thailand) – No. (%)                 | 39 (22%)      |
| Age (yr)                                             |               |
| Median (min-max)                                     | 30 (35-54)    |
| NA – No. (%)                                         | 12 (7%)       |
| Education (years of education at enrollment)         |               |
| Less than Secondary – No. (%)                        | 137 (77%)     |
| Completed Secondary – No. (%)                        | 24 (14%)      |
| Post-Secondary – No. (%)                             | 16 (9%)       |
| Weight (Kg)                                          |               |
| Median (min-max)                                     | 57 (36.40-93) |
| NA – No. (%)                                         | 15 (8%)       |
| Currently living with partner                        |               |
| Yes – No. (%)                                        | 77 (44%)      |
| No – No. (%)                                         | 91 (51%)      |
| NA – No. (%)                                         | 9 (5%)        |
| <b><u>Risk behavior</u></b>                          |               |
| Use any drugs in last 3 months                       |               |
| Yes – No. (%)                                        | 112 (63%)     |
| No – No. (%)                                         | 56 (32%)      |
| NA – No. (%)                                         | 9 (5%)        |
| How often injected in last 3 months                  |               |
| Daily – No. (%)                                      | 17 (9%)       |
| Weekly or less often– No. (%)                        | 95 (54%)      |
| NA – No. (%)                                         | 65 (37%)      |
| Number of heterosexual sex partners in last 3 months |               |
| Median (min-max)                                     | 1 (1-9)       |
| NA – No. (%)                                         | 9 (5%)        |
| Frequency of sex with partner                        |               |
| Never– No. (%)                                       | 18 (10%)      |
| Almost never – No. (%)                               | 5 (3%)        |
| 50:50 – No. (%)                                      | 13 (7%)       |
| Almost always – No. (%)                              | 32 (18%)      |

|                                       |           |
|---------------------------------------|-----------|
| Always – No. (%)                      | 9 (5%)    |
| NA – No. (%)                          | 100 (57%) |
| Condom used with partner              |           |
| Never– No. (%)                        | 27 (15%)  |
| Almost never – No. (%)                | 16 (6%)   |
| 50:50 – No. (%)                       | 3 (2%)    |
| Almost always – No. (%)               | 8 (4%)    |
| Always – No. (%)                      | 5 (3%)    |
| NA – No. (%)                          | 118 (67%) |
| Condom used with casual partner       |           |
| Never– No. (%)                        | 6 (3%)    |
| Almost never – No. (%)                | 12 (7%)   |
| 50:50 – No. (%)                       | 15 (8%)   |
| Almost always – No. (%)               | 12 (7%)   |
| Always – No. (%)                      | 28 (16%)  |
| NA – No. (%)                          | 104 (59%) |
| Anal sex in last 3 months             |           |
| Yes– No. (%)                          | 13 (7%)   |
| No – No. (%)                          | 134 (75%) |
| NA – No. (%)                          | 30 (17%)  |
| Number of men had anal sex with       |           |
| 0-3– No. (%)                          | 7 (4%)    |
| >3 – No. (%)                          | 6 (3%)    |
| NA – No. (%)                          | 164 (93%) |
| Frequency anal sex with men           |           |
| Never– No. (%)                        | 0 (0%)    |
| Almost never – No. (%)                | 7 (4%)    |
| 50:50 – No. (%)                       | 4 (2%)    |
| Almost always – No. (%)               | 2 (1%)    |
| Always – No. (%)                      | 0 (0%)    |
| NA – No. (%)                          | 164 (93%) |
| Frequency receptive anal sex          |           |
| Never– No. (%)                        | 7 (4%)    |
| Almost never – No. (%)                | 3 (2%)    |
| 50:50 – No. (%)                       | 2 (1%)    |
| Almost always – No. (%)               | 1 (<1%)   |
| Always – No. (%)                      | 0 (0%)    |
| NA – No. (%)                          | 164 (93%) |
| Condom used anal sex                  |           |
| Never– No. (%)                        | 1 (<1%)   |
| Almost never – No. (%)                | 1 (<1%)   |
| 50:50 – No. (%)                       | 4 (2%)    |
| Almost always – No. (%)               | 1 (<1%)   |
| Always – No. (%)                      | 6 (3%)    |
| NA – No. (%)                          | 164 (93%) |
| Sex with casual partner last 3 months |           |
| Never– No. (%)                        | 90 (51%)  |
| Almost never – No. (%)                | 44 (25%)  |
| 50:50 – No. (%)                       | 22 (12%)  |
| Almost always – No. (%)               | 9 (5%)    |
| Always – No. (%)                      | 3 (2%)    |
| NA – No. (%)                          | 9 (5%)    |

---

No.: Total number of individuals at each group. NA: Information not available.

Table S1.(e) Population characteristics and risk factors in TDF2 study

| <b>TDF2</b>                                            |                   |
|--------------------------------------------------------|-------------------|
| <b>Population – No. (total)</b>                        |                   |
| Heterosexual men & women at high risk                  | 606               |
| <b><u>Demographics</u></b>                             |                   |
| Sex at birth                                           |                   |
| Male – No. (%)                                         | 331 (55%)         |
| Female – No. (%)                                       | 275 (45%)         |
| Ethnicity                                              |                   |
| Black/African American – No. (%)                       | 606 (100%)        |
| Country                                                |                   |
| Botswana– No. (%)                                      | 606 (100%)        |
| Study site (Location)                                  |                   |
| Gaborone (Botswana) – No. (%)                          | 325 (54%)         |
| Francistown (Botswana) – No. (%)                       | 281 (46%)         |
| Age (yr)                                               |                   |
| Median (min-max)                                       | 24 (18-39)        |
| Education                                              |                   |
| Less than Secondary – No. (%)                          | 231 (38%)         |
| Completed Secondary – No. (%)                          | 232 (38%)         |
| Post-Secondary – No. (%)                               | 143 (24%)         |
| Marital status                                         |                   |
| Single – No. (%)                                       | 568 (94%)         |
| Married – No. (%)                                      | 38 (6%)           |
| Weight (Kg)                                            |                   |
| Median (min-max)                                       | 60 (37.30-136.10) |
| NA – No. (%)                                           | 15 (2%)           |
| <b><u>Sexual Transmitted Infections</u></b>            |                   |
| Trichomonas test                                       |                   |
| Negative – No. (%)                                     | 233 (39%)         |
| Positive – No. (%)                                     | 14 (2%)           |
| NA – No. (%)                                           | 359 (59%)         |
| Gonorrhea                                              |                   |
| Negative – No. (%)                                     | 552 (91%)         |
| Positive – No. (%)                                     | 12 (2%)           |
| NA – No. (%)                                           | 42 (7%)           |
| Chlamydia                                              |                   |
| Negative – No. (%)                                     | 511 (84%)         |
| Positive – No. (%)                                     | 54 (9%)           |
| NA – No. (%)                                           | 41 (7%)           |
| Syphilis                                               |                   |
| Negative – No. (%)                                     | 586 (97%)         |
| Positive – No. (%)                                     | 9 (1%)            |
| NA – No. (%)                                           | 11 (2%)           |
| <b><u>Risk behavior</u></b>                            |                   |
| Number of sex partners in the past month               |                   |
| Median (min-max)                                       | 1 (0-10)          |
| NA – No. (%)                                           | 11 (2%)           |
| Number of vaginal sex acts (main partner)              |                   |
| Median (min-max)                                       | 5 (0-168)         |
| NA – No. (%)                                           | 183 (30%)         |
| Number of vaginal sex acts using condom (main partner) |                   |
| Median (min-max)                                       | 4 (0-75)          |
| NA – No. (%)                                           | 184 (30%)         |

No.: Total number of individuals at each group.

## Supplemental Material. Preliminary analysis

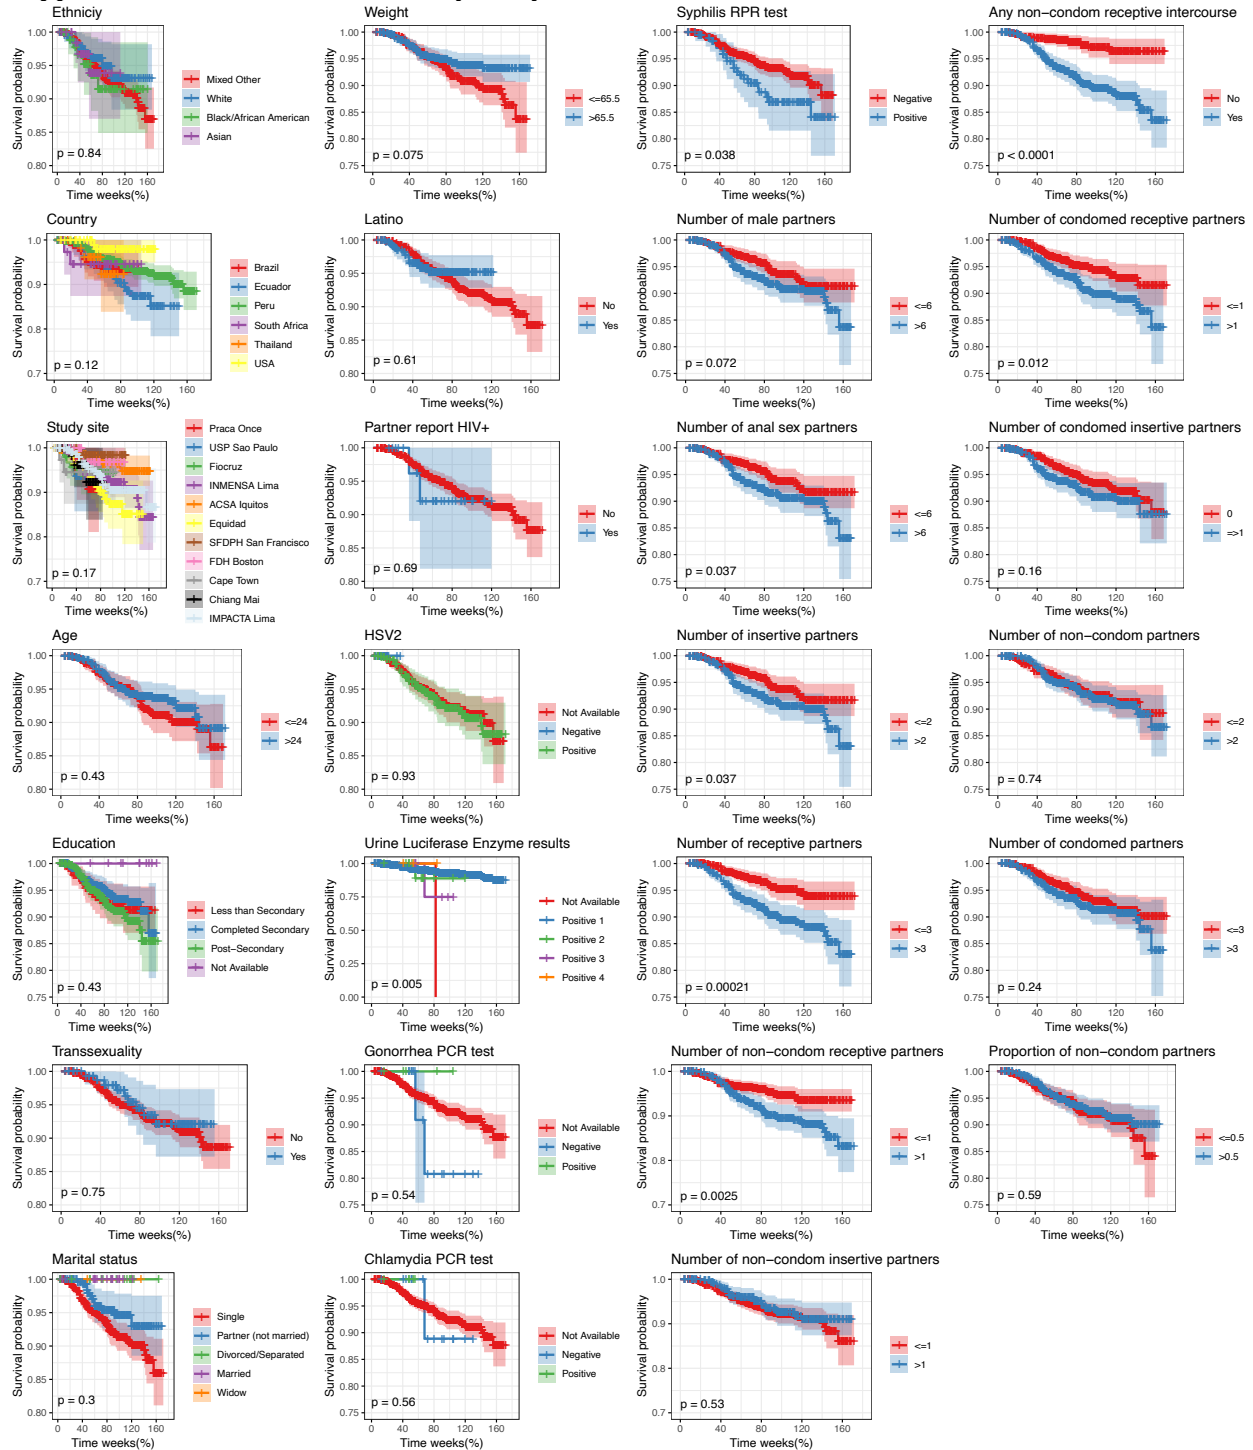

Figure S1. Kaplan Meier plots for HIV-free % for iPrEx' population characteristics. \*Sexual risk behavior characteristics are accounted from the past 3 moths to baseline.

Table S2. Univariate cox-regression analyses for iPrEx study.

|                                                                                        | <b>beta</b> | <b>HR (95% CI for HR)</b> | <b>p.value</b> |
|----------------------------------------------------------------------------------------|-------------|---------------------------|----------------|
| Ethnicity (reference Mixed/Other)                                                      |             |                           |                |
| White                                                                                  | -0.29       | 1.33 (0.37-1.51)          | 0.423          |
| Black/African American                                                                 | 0.15        | 1.16 (0.5-2.68)           | 0.735          |
| Asian                                                                                  | 0.05        | 1.05 (0.33-3.39)          | 0.931          |
| Age (years)                                                                            | -0.024      | 0.98 (0.95-1)             | 0.11           |
| Education (reference Less than Secondary)                                              |             |                           |                |
| Completed Secondary                                                                    | -0.18       | 0.84 (0.45-1.56)          | 0.579          |
| Post-Secondary                                                                         | 0.15        | 1.17 (0.65-2.08)          | 0.6            |
| Not available                                                                          | -15         | 2.9E-07 (0-Inf)           | 0.994          |
| Transsexuality (reference No)                                                          |             |                           |                |
| Yes                                                                                    | -0.11       | 0.9 (0.46-1.74)           | 0.753          |
| Marital status (reference Single)                                                      |             |                           |                |
| Partner (not married)                                                                  | -0.5        | 0.61 (0.33)               | 0.11           |
| Divorced/Separated                                                                     | -16.15      | 9.7E-08 (0-Inf)           | 0.996          |
| Married                                                                                | -16.15      | 9.7E-08 (0-Inf)           | 0.996          |
| Widow                                                                                  | -16.15      | 9.7E-08 (0-Inf)           | 0.998          |
| Weight (Kg)                                                                            | -0.014      | 0.99 (0.97-1)             | 0.131          |
| Latino (reference No)                                                                  |             |                           |                |
| Yes                                                                                    | -0.15       | 0.86 (0.48- 1.55)         | 0.609          |
| Partner report HIV + (reference No)                                                    |             |                           |                |
| Yes                                                                                    | 0.29        | 1.3 (0.33-5.4)            | 0.69           |
| HSV2 (reference Negative)                                                              |             |                           |                |
| Positive                                                                               | 14.04       | 1.2E+6 (0-Inf)            | 0.997          |
| Urine Luciferase Enzyme result (reference Positive 1)                                  |             |                           |                |
| Positive 2                                                                             | 0.43        | 1.54 (0.21-11.09)         | 0.669          |
| Positive 3                                                                             | 1.01        | 2.74 (0.38-19.73)         | 0.317          |
| Positive 4                                                                             | -13.01      | 2.24E-06 (0-Inf)          | 0.994          |
| Gonorrhea PCR test (reference Negative)                                                |             |                           |                |
| Positive                                                                               | -19.3       | 4.23E-09 (0-Inf)          | 0.999          |
| Chlamydia PCR test (reference Negative)                                                |             |                           |                |
| Positive                                                                               | 1.35        | 3.87 (0.24-62.4)          | 0.34           |
| Syphilis RPR (reference Negative)                                                      |             |                           |                |
| Positive                                                                               | 0.53        | 1.7 (1-2.8)               | 0.04           |
| Number of male partners                                                                | 0.0016      | 1 (1-1)                   | 0.479          |
| Number of anal sex partners                                                            | 0.002       | 1 (1-1)                   | 0.4            |
| Number of insertive partners                                                           | -0.0011     | 1 (0.99-1)                | 0.85           |
| Number of receptive partners                                                           | 0.0041      | 1 (1-1)                   | 0.083          |
| Number of non-condom receptive partners                                                | 0.008       | 1 (1-1)                   | 0.089          |
| Number of non-condom insertive partners                                                | -0.022      | 0.98 (0.94-1)             | 0.27           |
| Any non-condom receptive intercourse in the 3 months prior to screening (reference No) |             |                           |                |
| Yes                                                                                    | 1.36        | 3.9 (2.1-7.4)             | 2.59E-05       |
| Number of condomed receptive partners                                                  | 0.0048      | 1 (1-1)                   | 0.25           |
| Number of condomed insertive partners                                                  | 0.0012      | 1 (0.99-1)                | 0.77           |
| Number of non-condom partners                                                          | 0.0033      | 1 (0.99-1)                | 0.5            |
| Number of condomed partners                                                            | 0.0022      | 1 (1-1)                   | 0.37           |
| Proportion of non-condom partners                                                      | -0.11       | 0.89 (0.55-1.5)           | 0.65           |

*p.value reported for Wald test in univariate cox regression analysis*

*Missing values were excluded from this analysis*

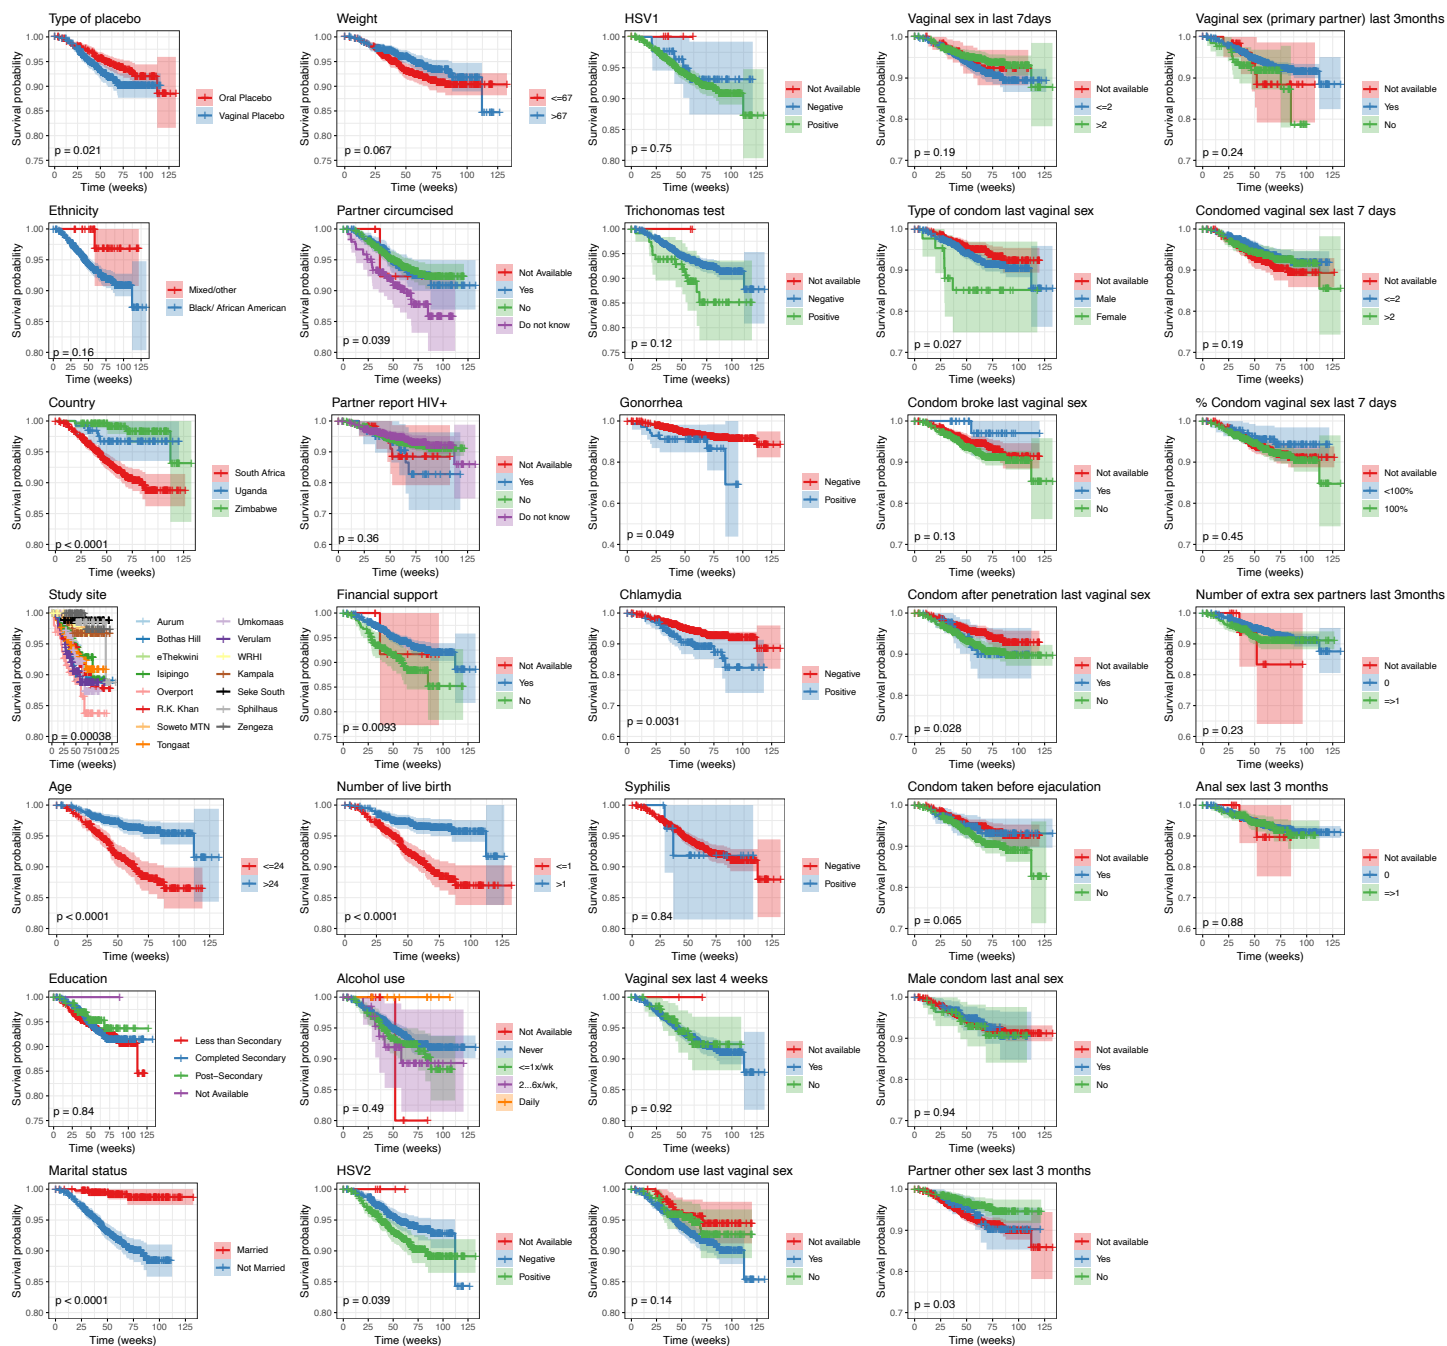

Figure S2. Kaplan Meier plots for HIV-free % for VOICE population characteristics.

Table S3. Univariate cox-regression analyses for VOICE study.

|                                                    | <b>beta</b> | <b>HR (95% CI for HR)</b> | <b>p.value</b> |
|----------------------------------------------------|-------------|---------------------------|----------------|
| Type of placebo (reference Oral)                   |             |                           |                |
| Vaginal                                            | 0.41        | 1.5 (1.1-2.13)            | 0.02           |
| Ethnicity (reference Mixed/other)                  |             |                           |                |
| Black/ African American                            | 1.3         | 3.755 (0.52-26.89)        | 0.2            |
| Country (reference South Africa)                   |             |                           |                |
| Uganda                                             | -1.1        | 0.34 (0.12-0.92)          | 0.03           |
| Zimbabwe                                           | -1.79       | 0.17 (0.06-0.46)          | 4.80E-04       |
| Age (years)                                        | -0.12       | 0.88 (0.85-0.92)          | 1.80E-08       |
| Education (reference Less than Secondary)          |             |                           |                |
| Completed Secondary                                | -0.05       | 0.95 (0.66-1.36)          | 0.774          |
| Post-Secondary                                     | -0.32       | 0.73 (0.35-1.52)          | 0.397          |
| Marital status (reference Married)                 |             |                           |                |
| Not married                                        | 2.33        | 10.29 (3.78-28.02)        | 5.08E-06       |
| Weight (kg)                                        | -0.014      | 0.99 (0.98-1)             | 0.02           |
| Partner circumcised (reference Yes)                |             |                           |                |
| No                                                 | -0.4        | 1.04 (0.64-1.43)          | 0.84           |
| Do not know                                        | 0.59        | 1.8 (1.1-3)               | 0.02           |
| Partner report HIV+ (reference Yes)                |             |                           |                |
| No                                                 | -0.42       | 1.68 (0.27-1.29)          | 0.19           |
| Do not know                                        | -0.66       | 1.93 (0.23-1.6)           | 0.11           |
| Financial support (reference Yes)                  |             |                           |                |
| No                                                 | 0.6         | 1.83 (1.24-2.7)           | 0.0026         |
| Number of live birth (children)                    | -0.47       | 0.62 (0.52-0.75)          | 1.10E-06       |
| Alcohol use (reference Never)                      |             |                           |                |
| Weekly or less                                     | 0.27        | 1.31 (0.89-1.94)          | 0.173          |
| 2-6 times per week                                 | 0.41        | 1.5 (0.66-3.44)           | 0.332          |
| Daily                                              | -14.9       | 3.2E-07 (0-Inf)           | 0.995          |
| HSV2 (reference Negative)                          |             |                           |                |
| Positive                                           | 0.4375      | 1.55 (1.09-2.19)          | 0.014          |
| HSV1(reference Negative)                           |             |                           |                |
| Positive                                           | 0.25        | 1.28 (0.52-3.13)          | 0.59           |
| Trichonomas test (reference Negative)              |             |                           |                |
| Positive                                           | 0.58        | 1.79 (1.01-3.18)          | 0.046          |
| Gonorrhea (reference Negative)                     |             |                           |                |
| Positive                                           | 0.7         | 2.02 (0.99-4.14)          | 0.054          |
| Chlamydia (reference Negative)                     |             |                           |                |
| Positive                                           | 0.63        | 1.88 (1.23-2.87)          | 0.004          |
| Syphilis (reference Negative)                      |             |                           |                |
| Positive                                           | 0.15        | 1.16 (0.29-4.7)           | 0.835          |
| Vaginal sex last 4 weeks (reference Yes)           |             |                           |                |
| No                                                 | -0.06       | 0.95 (0.52-1.71)          | 0.854          |
| Condom use last vaginal sex (reference Yes)        |             |                           |                |
| No                                                 | -0.31       | 0.73 (0.43-1.26)          | 0.256          |
| Number of vaginal sex in last 7 days               | -0.08       | 0.92 (0.85-1)             | 0.057          |
| Type of condom last vaginal sex (reference Male)   |             |                           |                |
| Female                                             | 0.76        | 2.14 (0.94-4.9)           | 0.071          |
| Condom used last vaginal sex broke (reference Yes) |             |                           |                |

|                                                                                                       |       |                   |       |
|-------------------------------------------------------------------------------------------------------|-------|-------------------|-------|
| No                                                                                                    | 1.4   | 4.04 (0.56-29)    | 0.165 |
| Condom last vaginal sex put on after penile penetration (reference Yes)                               |       |                   |       |
| No                                                                                                    | -0.08 | 0.92 (0.49-1.73)  | 0.803 |
| Condom used last vaginal sex taken off before ejaculation (reference Yes)                             |       |                   |       |
| No                                                                                                    | 0.35  | 1.42 (0.81-2.47)  | 0.22  |
| Male condom used during last anal sex (reference Yes)                                                 |       |                   |       |
| No                                                                                                    | 0.17  | 1.19 (0.5-2.8)    | 0.69  |
| Primary sex partner has sex with another partner last 3 months (reference Yes)                        |       |                   |       |
| No                                                                                                    | -0.57 | 0.57 (0.29-1.13)  | 0.106 |
| Vaginal sex with primary sex partner last 3 months (reference Yes)                                    |       |                   |       |
| No                                                                                                    | 0.46  | 1.58 (0.87-2.86)  | 0.133 |
| Number of Condomed vaginal sex last 7 days                                                            | 0.017 | 1.02 (0.95-1.09)  | 0.643 |
| %Condom use in vaginal sex last 7 days                                                                | 0.01  | 1.01 (0.995-1.03) | 0.174 |
| Number of sex partners (excluding primary sex partner) with whom had vaginal sex in the past 3 months | -0.02 | 0.98 (0.88-1.09)  | 0.727 |
| Number of anal sex in the past 3 months                                                               | -0.04 | 0.96 (0.83-1.11)  | 0.572 |

---

*p.value reported for Wald test in univariate cox regression analysis*

*Missing values were excluded from this analysis*

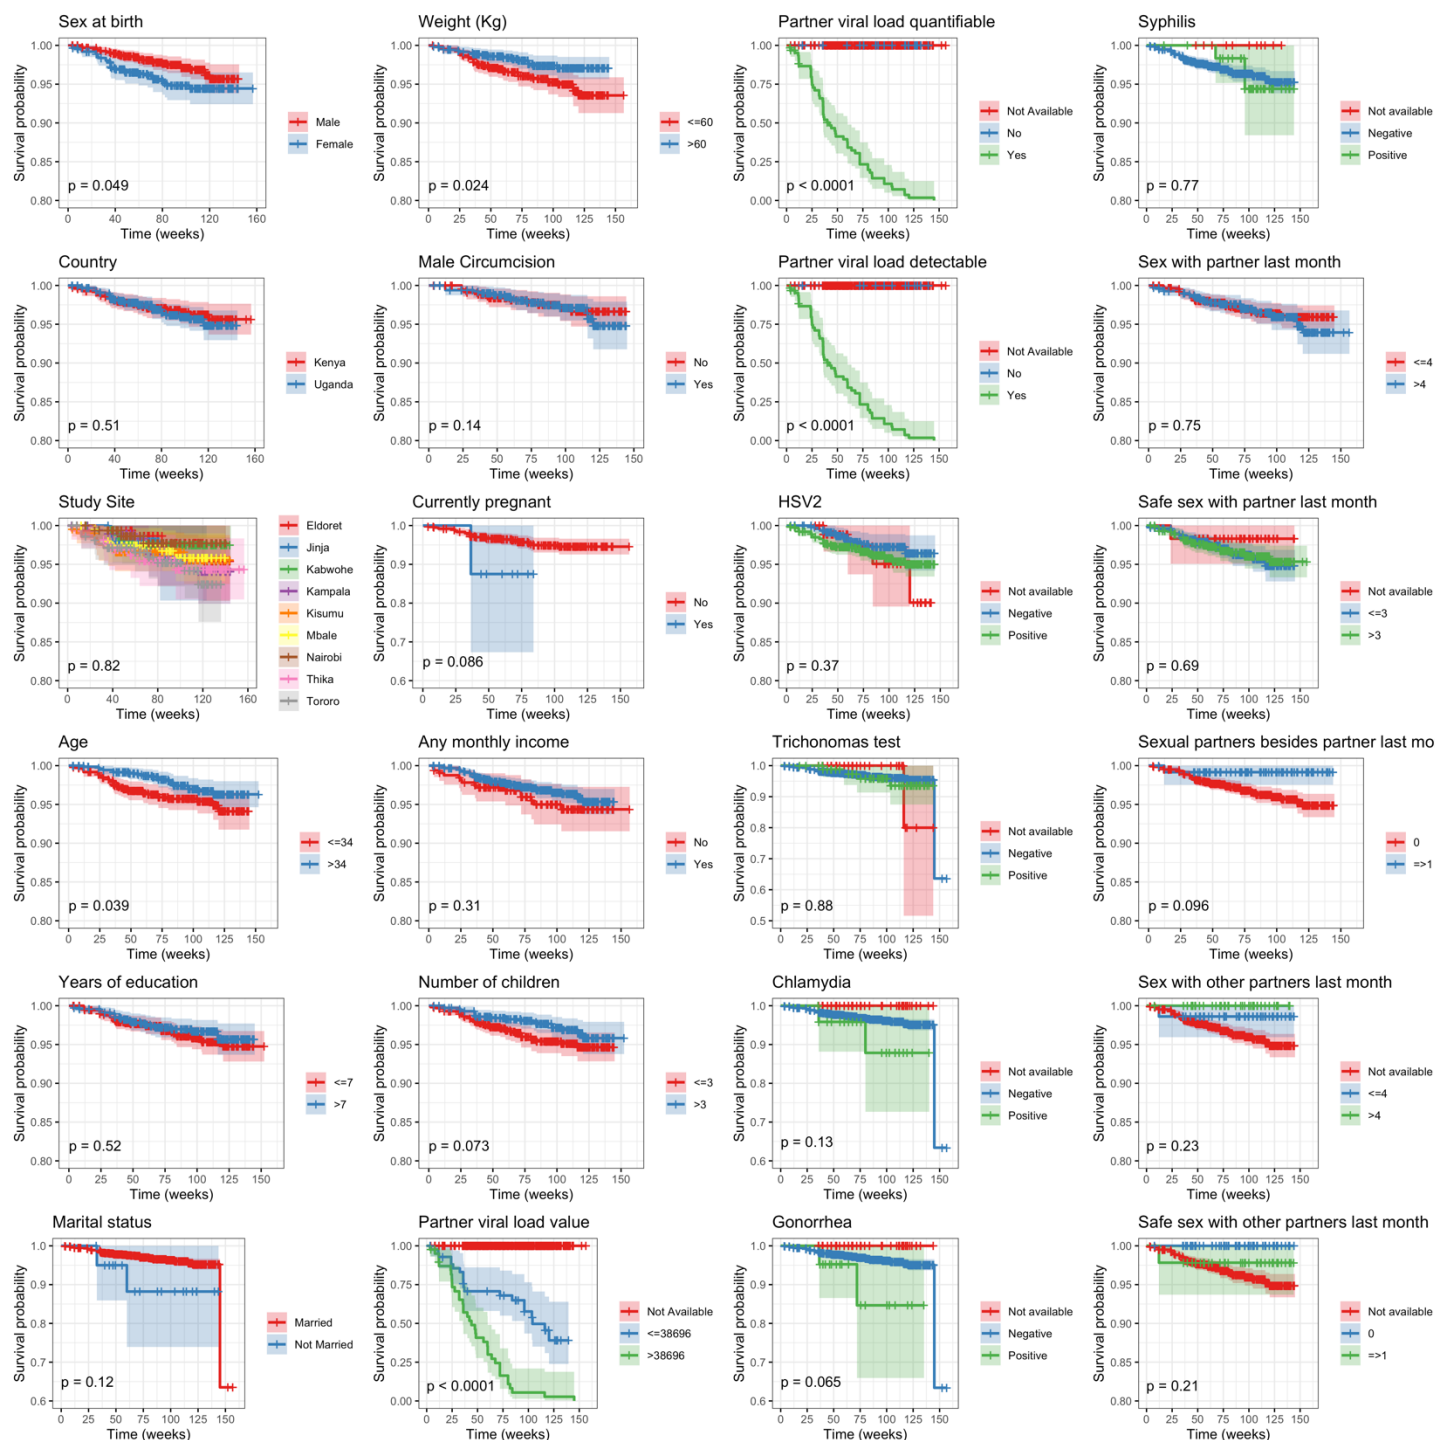

Figure S3. Kaplan Meier plots for HIV-free % for Partners PrEP' population characteristics. Individual characteristics shown are baseline measurements instead of Partner viral load value, Partner viral load quantifiable and Partner viral load detectable, which last values before HIV infection or censor are used in this plot representation.

Table S4. Univariate cox-regression analyses for Partners PrEP study.

|                                                        | <b>beta</b> | <b>HR (95% CI for HR)</b> | <b>p.value</b> |
|--------------------------------------------------------|-------------|---------------------------|----------------|
| Sex at birth (reference Male)                          |             |                           |                |
| Female                                                 | 0.52        | 1.7 (1-2.8)               | 0.052          |
| Age (years)                                            | -0.057      | 0.94 (0.91-0.98)          | 0.0013         |
| Years of education                                     | -0.054      | 0.95 (0.89-1)             | 0.103          |
| Marital status (reference Married)                     |             |                           |                |
| Not Married                                            | 1.07        | 2.9 (0.71-11.98)          | 0.137          |
| Weight                                                 | -0.035      | 0.97 (0.94-0.99)          | 0.022          |
| Male Circumcision* (reference No)                      |             |                           |                |
| Yes                                                    | 0.119       | 1.13 (0.53-2.41)          | 0.758          |
| Currently Pregnant** (reference No)                    |             |                           |                |
| Yes                                                    | 1.171       | 3.23 (0.44-23.81)         | 0.251          |
| Monthly Income (reference No)                          |             |                           |                |
| Yes                                                    | -0.302      | 0.74 (0.41-1.34)          | 0.317          |
| Number of children                                     | -0.137      | 0.87 (0.78-0.98)          | 0.021          |
| Partner viral load value                               | 3.59E-08    | 1 (1-1)                   | 0.229          |
| Partner viral load quantifiable (reference No)         |             |                           |                |
| Yes                                                    | 20.17       | 5.7E+08 (0-Inf)           | 0.995          |
| Partner viral load detectable (reference No)           |             |                           |                |
| Yes                                                    | 19.83       | 4.1E+08 (0-Inf)           | 0.996          |
| HSV2 (reference Negative)                              |             |                           |                |
| Positive                                               | 0.434       | 1.54 (0.81-2.94)          | 0.188          |
| Trichomona test (reference Negative)                   |             |                           |                |
| Positive                                               | 0.251       | 1.29 (0.46-3.56)          | 0.629          |
| Chlamydia (reference Negative)                         |             |                           |                |
| Positive                                               | 0.897       | 2.5 (0.6-10.06)           | 0.213          |
| Gonorrhea (reference Negative)                         |             |                           |                |
| Positive                                               | 1.175       | 3.24 (0.79-13.31)         | 0.103          |
| Syphilis (reference Negative)                          |             |                           |                |
| Positive                                               | 0.156       | 1.17 (0.37-3.75)          | 0.792          |
| Sex with partner last month (frequency)                | 0.019       | 1.02 (0.97-1.07)          | 0.405          |
| Safe sex with partner last month (frequency)           | 0.0034      | 1 (0.99-1.02)             | 0.656          |
| Sexual partners besides regular partner last month     | -1.44       | 0.24 (0.04-1.62)          | 0.14           |
| Sex with other partners last month*** (frequency)      | -17.9       | 1.69E-08 (0-Inf)          | 0.998          |
| Safe sex with other partners last month*** (frequency) | -0.68       | 0.93 (0.37-2.35)          | 0.886          |

*p.value reported for Wald test in univariate cox regression analysis*

*Missing values were excluded from this analysis*

*\*Including only males at birth*

*\*\* Including only females at birth*

*\*\*\* Including only those participants who have sexual partners besides regular partner*

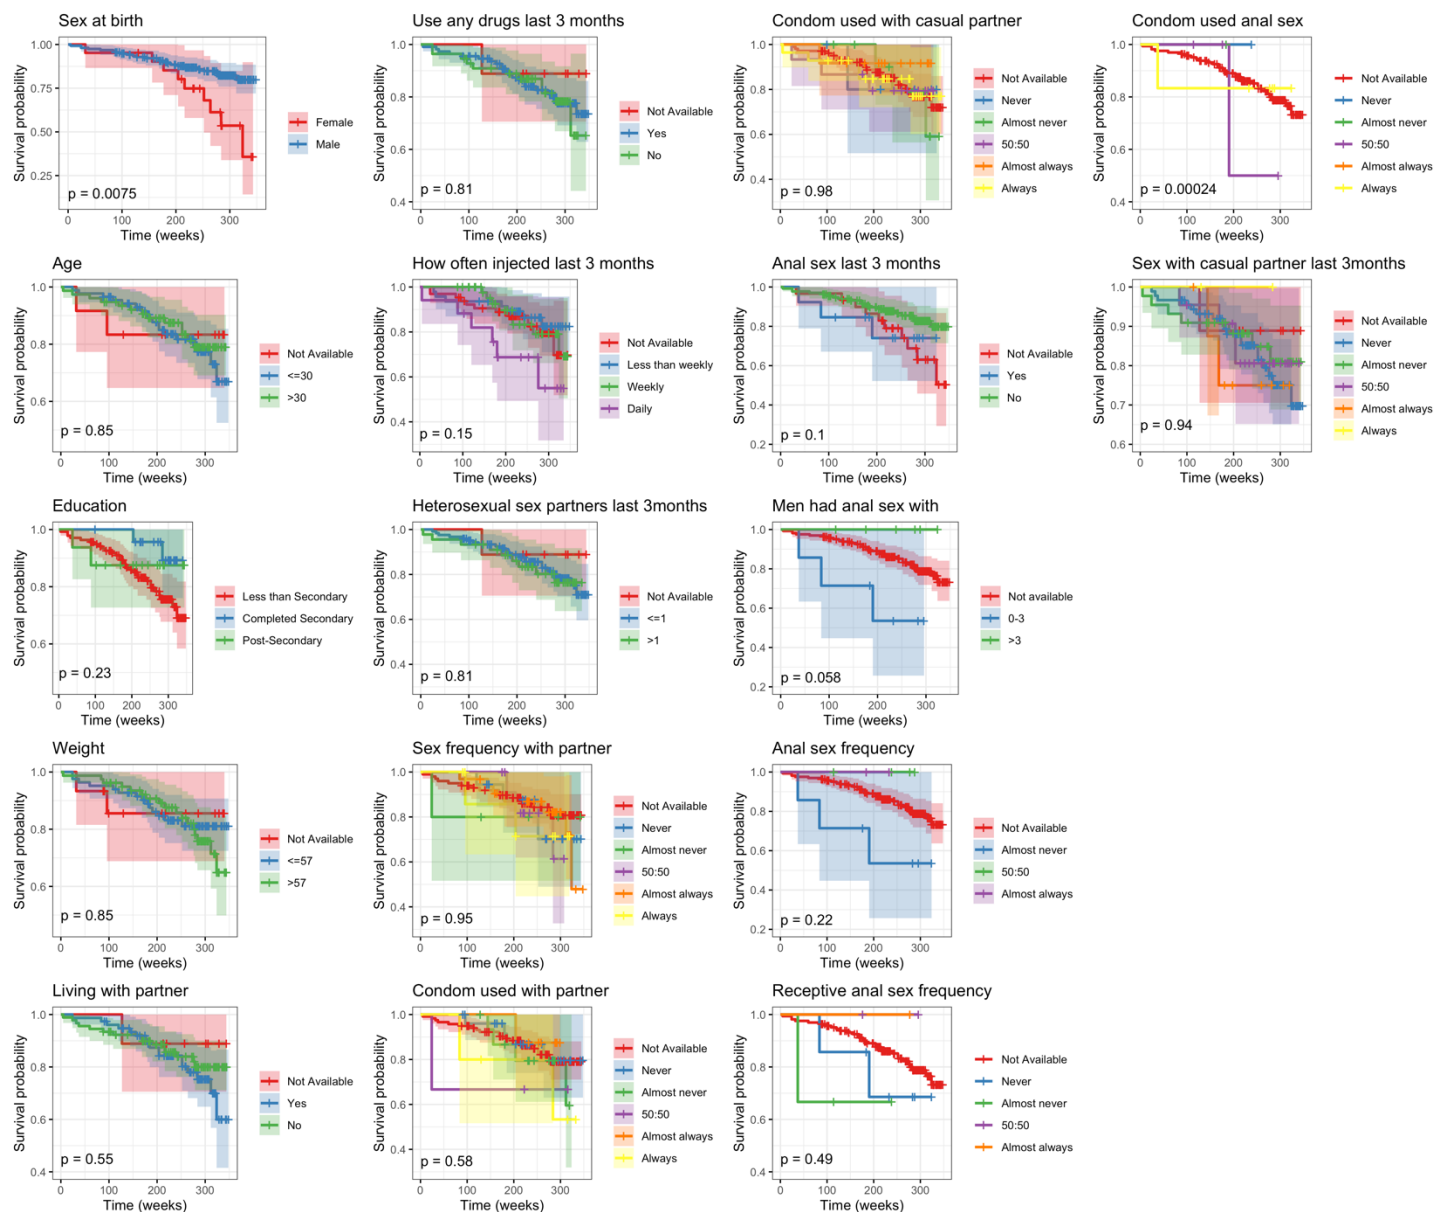

Figure S4. Kaplan Meier plots for HIV-free % for BTS' population characteristics.

Table S5. Univariate cox-regression analyses for BTS study.

|                                                                  | beta   | HR (95% CI for HR) | p.value |
|------------------------------------------------------------------|--------|--------------------|---------|
| Sex at birth (reference Female)                                  |        |                    |         |
| Male                                                             | -1     | 0.37 (0.17-0.79)   | 0.0103  |
| Age (years)                                                      | -0.015 | 0.99 (0.95-1.03)   | 0.478   |
| Education (reference Less than secondary)                        |        |                    |         |
| Completed Secondary                                              | -1.13  | 0.32 (0.08-1.36)   | 0.124   |
| Post-Secondary                                                   | -0.46  | 0.63 (0.15-2.63)   | 0.525   |
| Weight (Kg)                                                      | 0.004  | 0.996 (0.96-1.03)  | 0.799   |
| Living with partner (reference Yes)                              |        |                    |         |
| No                                                               | -0.315 | 0.73 (0.36-1.46)   | 0.375   |
| Use any drugs last 3 months (reference Yes)                      |        |                    |         |
| No                                                               | 0.072  | 1.07 (0.52-2.24)   | 0.847   |
| How often injected last 3 months (reference Less than weekly)    |        |                    |         |
| Weekly                                                           | 0.3    | 1.35 (0.49-3.74)   | 0.559   |
| Daily                                                            | 1.2    | 3.33 (1.11- 9.96)  | 0.032   |
| Heterosexual sex partners last 3months                           | 0.012  | 1.01 (0.88-1.17)   | 0.865   |
| Sex frequency with partner (reference Never)                     |        |                    |         |
| Almost never                                                     | 0.007  | 1.01 (0.11-9.03)   | 0.995   |
| 50:50                                                            | 0.211  | 1.23 (0.27-5.66)   | 0.786   |
| Almost always                                                    | -0.074 | 0.93 (0.27-3.19)   | 0.906   |
| Always                                                           | 0.191  | 1.21 (0.22-6.73)   | 0.827   |
| Condom used with partner (reference Never)                       |        |                    |         |
| Almost never                                                     | 0.679  | 1.97 (0.53-7.36)   | 0.313   |
| 50:50                                                            | 0.977  |                    | 0.385   |
| Almost always                                                    | -0.222 |                    | 0.843   |
| Always                                                           | 0.829  |                    | 0.346   |
| Condom used with casual partner (reference Never)                |        |                    |         |
| Almost never                                                     | 0.302  | 1.35 (0.14-13.01)  | 0.794   |
| 50:50                                                            | 0.178  | 1.19 (0.12-11.53)  | 0.878   |
| Almost always                                                    | -0.69  | 1.5 (0.03-8.03)    | 0.626   |
| Always                                                           | 0.163  | 1.18 (0.14-10.15)  | 0.882   |
| Anal sex last 3 months (reference Yes)                           |        |                    |         |
| No                                                               | -0.604 | 0.55 (0.16-1.84)   | 0.33    |
| Men had anal sex with (Reference 0.3)                            |        |                    |         |
| >3                                                               | -21.1  | 6.48E-10 (0-Inf)   | 0.999   |
| Anal sex frequency (reference Almost never)                      |        |                    |         |
| 50:50                                                            | -21.1  | 6.48E-10 (0-Inf)   | 0.999   |
| Almost always                                                    | -21.1  | 6.51E-10 (0-Inf)   | 1       |
| Receptive anal sex frequency (reference Never)                   |        |                    |         |
| Almost never                                                     | 0.52   | 1.69 (0.15-19.18)  | 0.66    |
| 50:50                                                            | -19.36 | 3.89E-09 (0-Inf)   | 0.999   |
| Almost always                                                    | -19.37 | 3.86E-09 (0-Inf)   | 0.999   |
| Condom used anal sex frequency (reference Never)                 |        |                    |         |
| Almost never                                                     | -0.024 | 0.98 (0-Inf)       | 1       |
| 50:50                                                            | 19.06  | 1.89E+08 (0-Inf)   | 0.999   |
| Almost always                                                    | 21     | 1.32E+09 (0-Inf)   | 0.999   |
| Always                                                           | 18.44  | 1.02E+08 (0-Inf)   | 0.999   |
| Sex with casual partner last 3months frequency (reference Never) |        |                    |         |
| Almost never                                                     | -0.247 | 0.78 (0.33-1.87)   | 0.58    |
| 50:50                                                            | -0.156 | 0.86 (0.29-2.53)   | 0.778   |
| Almost always                                                    | 0.289  | 1.34 (0.31-5.78)   | 0.698   |
| Always                                                           | 0.465  | 1.59 (0.21-11.96)  | 0.651   |

*p.value reported for Wald test in univariate cox regression analysis*

*Missing values were excluded from this analysis*

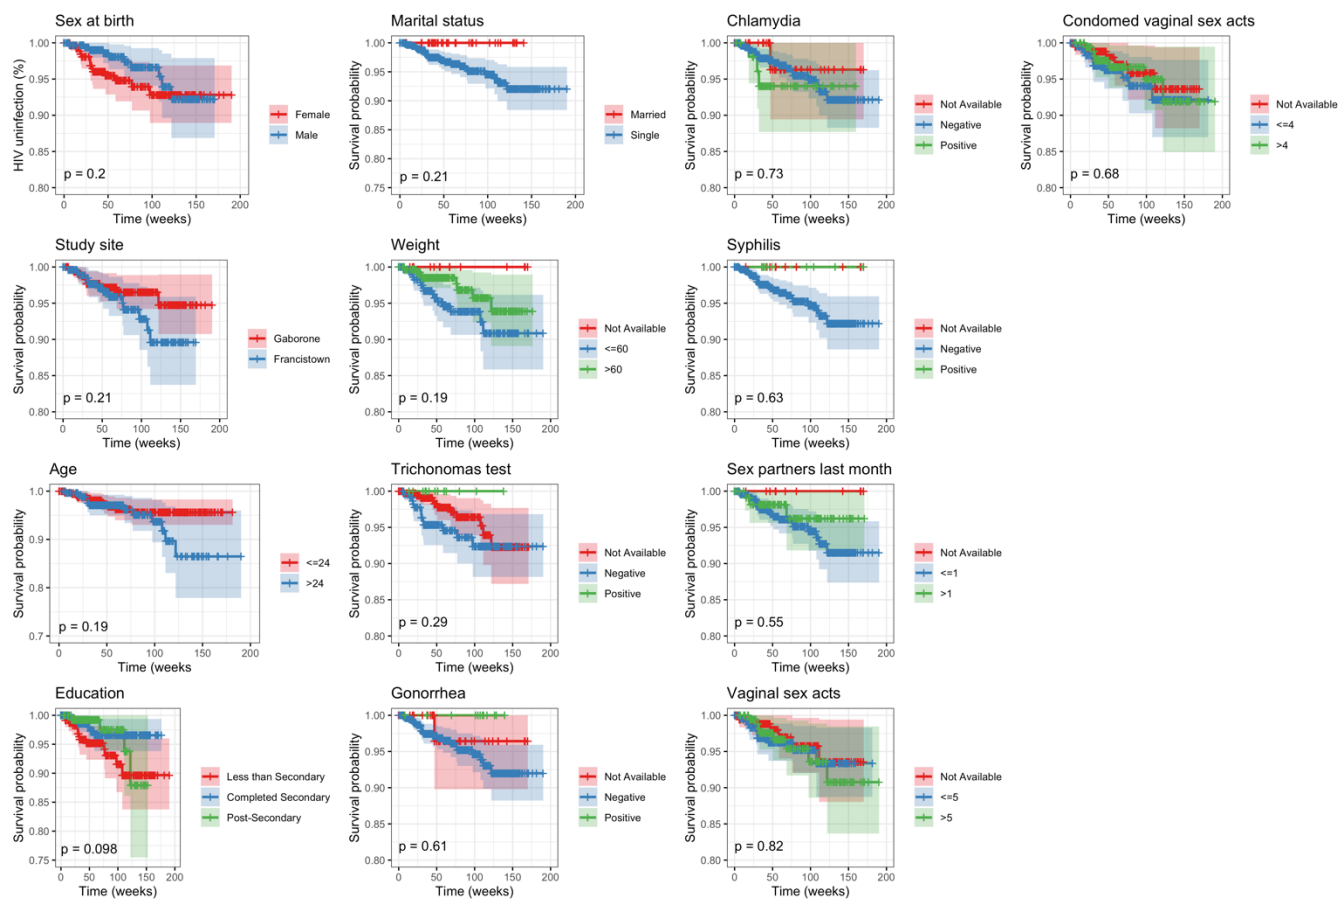

Figure S5. Kaplan Meier plots for HIV-free % for TDF2' population characteristics.

Table S6. Univariate cox-regression analyses for TDF2 study.

|                                           | <b>beta</b> | <b>HR (95% CI for HR)</b> | <b>p.value</b> |
|-------------------------------------------|-------------|---------------------------|----------------|
| Sex at birth (reference Female)           |             |                           |                |
| Male                                      | -0.52       | 0.59 (0.26-1.3)           | 0.209          |
| Study site (reference Gaborone)           |             |                           |                |
| Francistown                               | 0.515       | 1.67 (0.74-3.77)          | 0.214          |
| Age                                       | 0.0297      | 1.03 (0.92-1.15)          | 0.591          |
| Education (reference Less than Secondary) | -0.941      | 0.39 (0.15-1.02)          | 0.054          |
| Completed Secondary                       | -0.725      | 0.48 (0.16-1.47)          | 0.201          |
| Post-Secondary                            |             |                           |                |
| Marital status (reference Married)        |             |                           |                |
| Single                                    | 17.1        | 2.7E+07 (0-Inf)           | 0.999          |
| Weight (Kg)                               | -0.039      | 0.96 (0.92-1)             | 0.06           |
| Trichomonas test (reference Negative)     |             |                           |                |
| Positive                                  | -17.1       | 3.8E-08 (0-Inf)           | 0.998          |
| Gonorrhea (reference Negative)            |             |                           |                |
| Positive                                  | -16.1       | 1.07E-07 (0-Inf)          | 0.997          |
| Chlamydia (reference Negative)            |             |                           |                |
| Positive                                  | 0.379       | 1.46 (0.43-4.92)          | 0.54           |
| Syphilis (reference Negative)             |             |                           |                |
| Positive                                  | -16.03      | 1.1E-07 (0-Inf)           | 0.997          |
| Sex partners last month                   | -0.23       | 0.77 (0.44-1.35)          | 0.363          |
| Vaginal sex acts                          | -0.015      | 0.98 (0.92-1.05)          | 0.655          |
| Condomed vaginal sex acts                 | -0.032      | 0.97 (0.89-1.06)          | 0.475          |

*p.value reported for Wald test in univariate cox regression analysis*

*Missing values were excluded from this analysis*

**Supplementary Table S7.** Distribution of identified risk factors (low risk characteristics) among low,

| Study         | Participant risk factors                                    | Number of participants with those risk factor | Proportion of participants with those risk factors in each risk strata |                |                |
|---------------|-------------------------------------------------------------|-----------------------------------------------|------------------------------------------------------------------------|----------------|----------------|
|               |                                                             |                                               | Low                                                                    | Moderate       | High           |
| iPrEx         | Use of condom when receptive partner                        | 484                                           | 83/484 (17%)                                                           | 401/484 (83%)  | 0/484 (0%)     |
|               | Age $\geq 24$                                               | 648                                           | 90/648 (14%)                                                           | 420/648 (65%)  | 138/648 (21%)  |
|               | Syphilis -                                                  | 1040                                          | 81/1040 (7%)                                                           | 599/1040 (58%) | 360/1040 (34%) |
| VOICE         | Herpes2 -                                                   | 1082                                          | 256/1082 (24%)                                                         | 679/1082(63%)  | 147/1082 (13%) |
|               | Being married                                               | 426                                           | 388/426 (91%)                                                          | 38/426 (9%)    | 0/426 (0%)     |
|               | Age $\geq 24$                                               | 1114                                          | 405/1114 (36%)                                                         | 568/1114 (51%) | 141/1114 (13%) |
|               | Primary sex partner does not have sex with another partners | 1777                                          | 400/1777 (23%)                                                         | 937/1777 (53%) | 440/1777 (25%) |
|               | Receive financial support                                   | 1646                                          | 432/1646 (26%)                                                         | 877/1646 (53%) | 337/1646 (20%) |
|               | 1 child or more                                             | 1704                                          | 447/1704 (26%)                                                         | 859/1704 (50%) | 398/1704 (23%) |
| Partners PrEP | Male                                                        | 953                                           | 424/953 (44%)                                                          | 529/953 (56%)  | 0/953 (0%)     |
|               | Age $\geq 34$                                               | 819                                           | 434/819 (53%)                                                          | 385/819 (47%)  | 0/819 (0%)     |
|               | More than 3 children                                        | 955                                           | 401/955 (42%)                                                          | 552/955 (58%)  | 2/955 (0.1%)   |
| Bangkok       | Male                                                        | 156                                           | 0/156 (0%)                                                             | 139/156 (89%)  | 17/156 (11%)   |
|               | Weekly or less frequency drug injection                     | 95                                            | 0/95 (0%)                                                              | 78/95 (82%)    | 17/95 (18%)    |

medium, and high-risk.

## **Supplemental Material. Additional Results.**

### Substantial differences in risk within each population. Detailed description of model predictors in each study.

For the *MSM/TGW* population, age, syphilis seroreactivity and receptive anal intercourse without a condom in the 3 months before screening were identified as predictors of the baseline hazard during the forward inclusion ( $p < 0.05$ ) of the SCM analysis; therefore, these predictors were incorporated in the final multivariate parametric model. The inclusion of syphilis seroreactivity showed a  $p > 0.05$  and a high RSE of its corresponding parameter (Table II), probably due to a misrepresentation of the syphilis positive individuals in the current dataset (15%) (Table SIa). Nevertheless, syphilis seroreactivity was kept as a predictor in the final model (supported by the Kaplan Meier plot of the raw data (Figure S1)). Receptive anal intercourse without a condom was the strongest predictor of HIV infection among MSM/TGW, with a calculated HR of 5.88, while younger participants (20 years old) had a HR of 1.12 and being syphilis positive had a HR of 1.64.

For the *young women at high sexual risk* in the VOICE trial, herpes simplex virus 2 (HSV2), marital status, age, and financial support provided by a partner were identified as significant predictors by the SCM analysis ( $p < 0.05$ ). The number of children was also incorporated in the model, which was supported by the Kaplan Meier plot of the raw data (Figure S2) and the univariate Cox regression analysis (Table S3). The last predictor incorporated in the model was if the primary sex partner has sex with another partner in the past 3 months, also supported by the Kaplan Meier plot of the raw data. Interestingly, those individuals with missing information (65%) showed a similar risk of HIV infection as those whose primary sex partner has sex with another partner (Figure S2). Therefore, the individuals with missing information were included in the same category as 'primary sex partner has sex with another partner'. Not being married was the strongest predictor of HIV infection in young women in the VOICE trial (HR=5.34), followed by HSV2 seropositivity (HR=1.99), if her partner has another sex partner (HR=1.79), if her partner does not provide financial support (HR=1.51), younger individuals (HR=1.2 for 21 years old), and has no children (HR=1.16).

For the *HIV negative partners in HIV-serodiscordant heterosexual couples (Partners PrEP)*, age and partner's viral load were identified as significant predictors by the SCM analysis; however, the latter was not retained in the multivariate model due to missing information in more than 90% of the individuals. Sex and number of children were included in the final multivariate model guided by the Kaplan Meier plots of the raw data (Figure S3). Age was included using a piece-wise linear function, where younger participants were at a higher risk (HR=2.52 for 28 years old), but at a specific age (34 years old, population median), the risk starts increasing with age (HR=1.35 for 40 years old). Women had a HR of 1.74 and women with no children has a HR of 1.25.

For the *people who inject drugs (BTS)*, sex and drug injection frequency were identified and included as significant predictors in the final multivariate model ( $p < 0.01$ ). For drug injection frequency, two categories included in the final model were *daily* and *weekly or less than weekly*. There were three categories in the BTS: *daily*, *weekly*, and *less than weekly*; however, there was no significant difference in weekly and less than weekly, and we combined these categories. Higher risk was observed in female participants (HR=3.33) and in those who use drugs daily (HR=3.22).

No predictors ( $p < 0.05$ ) were identified in the TDF2 study to be included in the model; therefore, only the baseline hazard risk for the entire population was characterized.

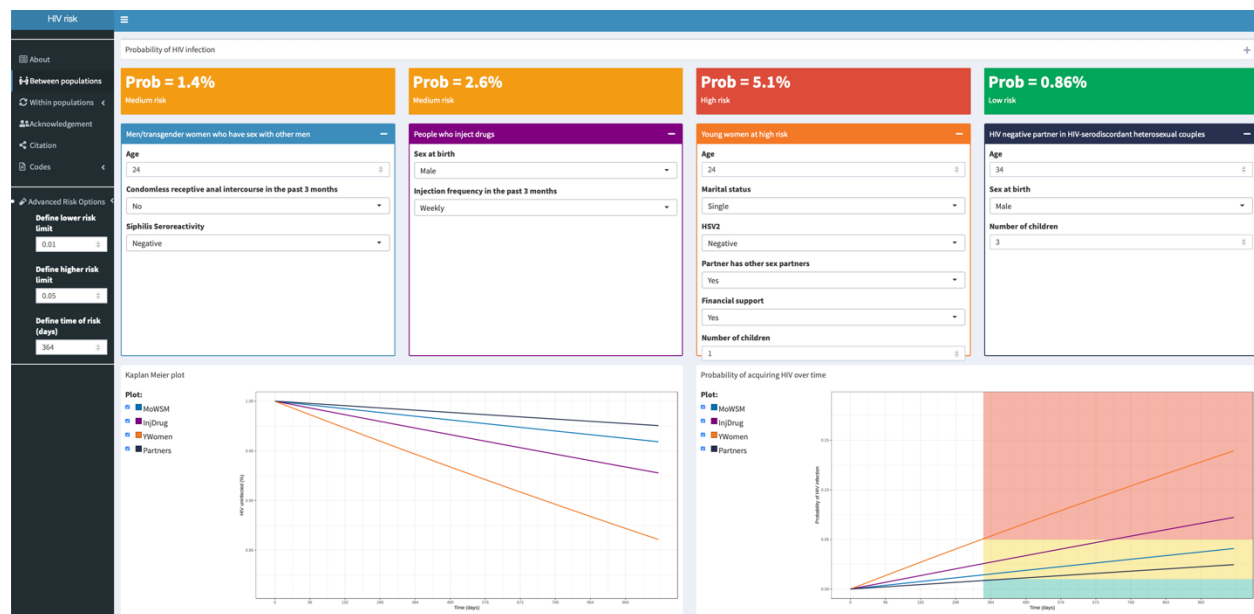

**Supplemental Figure S6. Interactive web application.** A page of the web app is shown that displays the probability of being HIV uninfected for the different key population based on the individual characteristics and risk factors.

## **Supplemental Material. Additional Discussion.**

### Comparison of the parametric models developed in this work with prior risk assessments tools.

The findings from the parametric models contribute to and are in agreement with the findings from prior risk assessment tools developed to predict HIV infection [14,16,17,27-31].

For the *MSM/TGW population*, not using condoms as a receptive partner has been identified as a predictor of HIV infection [17, 31]. Self-reported STI, specifically baseline syphilis seroreactivity, was identified as a predictor of HIV infection in a univariate analysis with a similar HR to HR in our study (1.58 vs 1.64, respectively) [31]. Smith et al. identified age as a significant predictor [7]. While several studies reported drug use as a significant predictor [17, 31], that predictor was unavailable in our database. Among *African women*, age, marital status, financial support provided by a partner, if the partner has another partner, HSV2 status, and alcohol consumption were included in a risk scoring tool [15], analyzing data from 3 RCTs [3,7,36] including VOICE. In contrast to our analysis, this assessment also included information from the treatment arms, which may act as a confounding factor in determining the true effect of each predictor on HIV risk. In the parametric model for this population, alcohol consumption was not significant during model building. Similarly, a risk assessment tool was developed for identifying couples at highest risk of HIV transmission [14] that included data from three studies in Africa of stable *serodiscordant couples* [4, 37,38] and the placebo arm of the Partners PrEP study as a validation cohort. Kahle et al. identified age, marital status, number of children, unprotected sex, uncircumcised male, and a partner's viral load as significant predictors. In contrast, our analysis found no significance for male circumcision (Figure S3) and marital status (99% married). Although information regarding safe sex and partner viral load was available, it was missing for approximately 90% of the individuals; even though these variables were found to be significant in sub cohort analysis, they were not used in the main analysis. As an example, among the 85 of 1574 individuals with viral load information available for a partner, 100% of the participants who had partners with quantifiable viral load (n=49) were acquired HIV during the follow up, and among participants who had partners with undetectable viral loads (n=36) none acquired HIV. This is consistent with studies indicating essentially no sexual HIV transmission risk when the viral load of the sexual partner is below detection limits [33]. For the *people who inject drugs* population, needle sharing was described

in the BTS study [5] as an important risk factor of HIV infection; however, that information was unavailable for analysis.

## Supplemental Material. NONMEM control stream files for the studies

### NONMEM control stream file for iPrEx study

```
;; 1. Based on: run9
;; 2. Description: OS-EXP. Placebo. STUDY1

$PROBLEM EXP_MODEL HIV_SURVIVAL PLACEBO

$INPUT ID PTT=DROP PTLAST=DROP PTMED=DROP PBTMED=DROP PTLMED=DROP PTLMED=DROP
TTLAST=DROP TTFVMED=DROP TTLMED=DROP FLAGTDP=DROP TIME PRODUCT HIVF HIV
CW=DROP TOT=DROP AN=DROP TF=DROP BF=DROP NCP=DROP NCIAP=DROP NCRAI=DROP
PRAI=DROP PIAI=DROP UPP=DROP PP=DROP PRU=DROP HSV=DROP URN=DROP URNG=DROP
URCL=DROP SYP SYP2=DROP PDFLAG SCCRAI SCRPAR=DROP LAT=DROP RACE=DROP AGE
EDU=DROP RINF=DROP SITE=DROP TRANS STUDY SEX MARST HEIGHT WEIGHT CRCL SECR EVID
DV FLAG_SIMUL DATHIV OFFD=DROP TVBI=DROP CTBI=DROP GCBI=DROP COHOR=DROP
TVBL=DROP CTBL=DROP GCBL=DROP SYPH3=DROP SYPPH4=DROP PSEXF=DROP PSAF=DROP
OTHP=DROP OSFR=DROP OSAFR=DROP HSV2BL=DROP HSV2=DROP BLCR=DROP PREG MINC=DROP
HIVA=DROP VIS=DROP GON=DROP CT=DROP HSV11=DROP HSV22=DROP HSV1W=DROP
HSV2W=DROP TV=DROP SECRE2=DROP

$DATA prepHIV_PD_final_180411.csv
IGNORE (FLAG_SIMUL.EQ.1)
IGNORE (PRODUCT.LT.10)
IGNORE (STUDY.NE.1)

$SUBROUTINE ADVAN13 TOL=9
$MODEL
COMP (HAZ)

;;time-date (weeks!)
;;dv- hiv
;; Data for estimation FLAG_SIMUL=0
;; Data for simulation FLAG=0 + FLAG=1
;; PRODUCT LT 10= PLACEBO
$PK

;;; BASESCCRAI-DEFINITION START
IF(SCCRAI.EQ.1) BASESCCRAI = 1 ; Most common
IF(SCCRAI.EQ.0) BASESCCRAI = ( 1 + THETA(2))
;;; BASESCCRAI-DEFINITION END

;;; BASEAGE-DEFINITION START
BASEAGE = ( 1 + THETA(3)*(AGE - 24))
;;; BASEAGE-DEFINITION END

;;; BASESYP-DEFINITION START
IF(SYP.EQ.0) BASESYP = 1 ; Most common
IF(SYP.EQ.1) BASESYP = ( 1 + THETA(4))
;;; BASESYP-DEFINITION END

;;; BASE-RELATION START
BASECOV=BASESCCRAI*BASEAGE*BASESYP
;;; BASE-RELATION END

;-----DROPOUT MODEL-----
A_0(1)=0
TVBASE=THETA(1)
```

```
TVBASE = BASECOV*TVBASE  
BASE=TVBASE*EXP(ETA(1))
```

```
$DES
```

```
;-----DROPOUT MODEL-----  
DEL=1E-6  
DADT(1)=BASE
```

```
$ERROR  
;-----DROPOUT MODEL-----  
CHZ = A(1) ;cumulative hazard  
SUR = EXP(-CHZ) ;survival probability  
DEL2=1E-6  
HAZNOW=BASE
```

```
IF (DV.EQ.0) Y=SUR  
IF (DV.EQ.1) Y=SUR*HAZNOW
```

```
$THETA  
(0, 0.00113) ; BASE  
(-1, -0.743,5) ; BASESCCRAI1  
(-0.1, -0.0273,0.167) ; BASEAGE1  
(-1,-0.1,5) ; BASESYPI
```

```
$OMEGA 0 FIX ; BASE
```

```
$ESTIMATION METHOD=0 LIKE MAXEVAL=9900 NOABORT PRINT=1 SIGL=9 NSIG=3 MSFO=msfb522  
$COV PRINT=E  
$TABLE ID TIME DV SUR CHZ FORMAT=s1PE15.8 ONEHEADER NOPRINT FILE=sdtab22
```

## NONMEM control stream file for VOICE study

```
:: 1. Based on: run30_voicf
:: 2. Description: with placebo_voice3_risksex_ST3
```

```
$PROBLEM EXP_MODEL HIV_SURVIVAL PLACEBO
```

```
$INPUT ID PLASMA_TFV_LAST=DROP PBMC_TFVDP_LAST=DROP TISSUE_TFV_LAST=DROP
PLASMA_TFV_MED=DROP PBMC_TFVDP_MED=DROP TISSUE_TFV_ME=DROP
PLASMA_TFV_LAST_MED=DROP PBMC_TFVDP_LAST_MED=DROP TISSUE_TFV_LAST_MED=DROP
FLAG_TFV_TFVDP=DROP TIME PRODUCT hiv_final=DROP hiv=DROP hiv_acute=DROP PD_flag=DROP
visit=DROP syph gon ct hsv1 HSV22 hsv1wb hsv2wb tv height secre=DROP crcl=DROP wt_kg sex MARST
education AGE CIRC CHILD FIN race=DROP C_3mvs C_4wvs C_7dvs C_7dvscn C_lvsc C_lvset C_7dpvsc
A_7dvs A_7dvscn A_lvsc A_lvset A_lvscb A_lvscA A_lvscE A_3masn A_lasmc A_3MPPSO A_3mvsp
A_3mvsn Q5 Q12 study=DROP EVID DV FLAG_SIMUL
```

```
$DATA Voice_PD_180919.csv
IGNORE (FLAG_SIMUL.EQ.1)
IGNORE (PRODUCT.LT.10)
```

```
$SUBROUTINE ADVAN13 TOL=9
```

```
$MODEL
COMP (HAZ)
```

```
::time-date (weeks!)
::dv- hiv
:: Data for estimation FLAG_SIMUL=0
:: Data for simulation FLAG=0 + FLAG=1
:: PRODUCT LT 10= PLACEBO
```

```
$PK
```

```
::: BASEHSV22-DEFINITION START
IF(HSV22.EQ.0) BASEHSV22 = 1 ; Most common
IF(HSV22.EQ.1) BASEHSV22 = ( 1 + THETA(2))
IF(HSV22.EQ.-99) BASEHSV22 = 1 ; Missing data
::: BASEHSV22-DEFINITION END
```

```
::: BASEMARST-DEFINITION START
IF(MARST.NE.3) BASEMARST = 1 ; Most common
IF(MARST.EQ.3) BASEMARST = ( 1 + THETA(3))
::: BASEMARST-DEFINITION END
```

```
::: BASEAGE-DEFINITION START
BASEAGE = ( 1 + THETA(4)*(AGE - 24))
::: BASEAGE-DEFINITION END
```

```
::: BASEA_3MPPSO-DEFINITION START
IF(A_3MPPSO.EQ.1) BASEA_3MPPSO = 1
IF(A_3MPPSO.EQ.-99) BASEA_3MPPSO = 1 ; Missing data
IF(A_3MPPSO.EQ.2) BASEA_3MPPSO = ( 1 + THETA(5))
```

```
::: BASEFIN-DEFINITION START
IF(FIN.EQ.1) BASEFIN = 1 ; Most common YES
IF(FIN.EQ.2) BASEFIN = ( 1 + THETA(6)) ;NO
IF(FIN.EQ.-99) BASEFIN = 1 ; Missing data
::: BASEHSV22-DEFINITION END
```

```

;;; BASECHILD-DEFINITION START
BASECHILD = ( 1 + THETA(7)*(CHILD - 1))
;;; BASECHILD-DEFINITION END

;;; BASE-RELATION START
BASECOV=BASEHSV22*BASEMARST*BASEAGE*BASEA_3MPPSO*BASEFIN*BASECHILD
;;; BASE-RELATION END

;-----DROPOUT MODEL-----
A_0(1)=0
TVBASE=THETA(1)
TVBASE = BASECOV*TVBASE
BASE=TVBASE*EXP(ETA(1))

$DES
;-----DROPOUT MODEL-----
DEL=1E-6
DADT(1)=BASE

$ERROR
;-----DROPOUT MODEL-----
CHZ = A(1) ;cumulative hazard
SUR = EXP(-CHZ) ;survival probability
DEL2=1E-6
HAZNOW=BASE

IF (DV.EQ.0) Y=SUR
IF (DV.EQ.1) Y=SUR*HAZNOW

$THETA
(0, 0.00102) ; BASE
(-1, 0.937,5) ; BASEHSV221
(-1, -0.836) ; BASEMARST1
(-0.1, -0.0764,0.167) ; BASEAGE1
(-1, -0.434,5) ;BASEA_3MPPSO
(-1, 0.581) ;BASEFIN
(-1, -0.1) ;BASCHILD
$OMEGA 0 FIX ; BASE

$ESTIMATION METHOD=0 LIKE MAXEVAL=9900 NOABORT PRINT=1 SIGL=9 NSIG=3
MSFO=msfb531_voice
$COV PRINT=E
$TABLE ID TIME DV SUR CHZ FORMAT=s1PE15.8 ONEHEADER NOPRINT FILE=sdtab31_voice

```

## NONMEM control stream file for Partners PrEP study

;; 1. Based on: run3\_3  
;; 2. Description: OS-EXP. BASE MODEL. Placebo. STUDY3

\$PROBLEM EXP\_MODEL HIV\_SURVIVAL PLACEBO

\$INPUT ID PLASMA\_TFV\_LAST=DROP PLASMA\_TFV\_MED=DROP PLASMA\_TFV\_LAST\_MED=DROP  
TISSUE\_TFV\_LAST=DROP TISSUE\_TFV\_MED=DROP TISSUE\_TFV\_LAST\_MED=DROP  
PBMC\_TFVDP\_LAST=DROP PBMC\_TFVDP\_MED=DROP PBMC\_TFVDP\_LAST\_MED=DROP  
FLAG\_TFV\_TFVDP=DROP TIME\_PRODUCT\_HIV\_FINAL=DROP HIV\_DATE\_HIV=DROP TVBI CTBI GCBI  
TVBL CTBL GCBL SYP SYPBL PSEXF PSAF OTHP OSEXF OSAF HSV2 HSV2\_C LOGVL VL VLDET  
VLQUANT OFFDRG=DROP WT HEIGHT=DROP AGE MARST EDU SEX BLCREAT=DROP PREG MINC  
PARI CIRC STU=DROP LOGV\_LAST VL\_LAST VLQ\_LAST VLDET\_LAST OSEXF\_LAST OSAFE\_LAST  
EVID DV FLAG\_SIMUL sittx=DROP count=DROP count2=DROP site=DROP

\$DATA Partners\_PD\_190424\_lastvl.csv  
IGNORE (FLAG\_SIMUL.EQ.1)  
IGNORE (PRODUCT.LT.10)

\$SUBROUTINE ADVAN13 TOL=9  
\$MODEL  
COMP (HAZ)

;;time-date (weeks!)  
;;dv- hiv  
;; Data for estimation FLAG\_SIMUL=0  
;; Data for simulation FLAG=0 + FLAG=1  
;; PRODUCT LT 10= PLACEBO

\$PK  
;;; BASEAGE-DEFINITION START  
IF(AGE.LE.34.00) BASEAGE = ( 1 + THETA(2)\*(AGE - 34))  
IF(AGE.GT.34.00) BASEAGE = ( 1 + THETA(3)\*(AGE - 34))  
;;; BASEAGE-DEFINITION END

;;; BASESEX-DEFINITION START  
IF(SEX.EQ.0) BASESEX = 1 ; Most common MALE  
IF(SEX.EQ.1) BASESEX = ( 1 + THETA(4)) ;FEMALE  
;;; BASESEX-DEFINITION END

;;; BASEPARI-DEFINITION START  
BASEPARI = ( 1 + THETA(5)\*(PARI - 3))  
;;; BASEPARI-DEFINITION END

;;; BASE-RELATION START  
BASECOV=BASEAGE\*BASESEX\*BASEPARI  
;;; BASE-RELATION END

A\_0(1)=0  
TVBASE=THETA(1)  
TVBASE = BASECOV\*TVBASE  
BASE=TVBASE\*EXP(ETA(1))

\$DES  
;-----DROPOUT MODEL-----  
DEL=1E-6

```

DADT(1)=BASE
$ERROR
;-----DROPOUT MODEL-----
CHZ = A(1)           ;cumulative hazard
SUR = EXP(-CHZ)      ;survival probability
DEL2=1E-6
HAZNOW=BASE

IF (DV.EQ.0) Y=SUR
IF (DV.EQ.1) Y=SUR*HAZNOW

$THETA
(0, 0.00016)         ; BASE
(-100000, -0.31,0.059) ; BASEAGE1
(-0.033, 0.0314,100000) ; BASEAGE2
(-1, 0.651,5)        ; BASesex
(-1,-0.05)           ; BASEPARI1

$OMEGA 0 FIX ;    BASE

$ESTIMATION METHOD=0 LIKE MAXEVAL=9900 NOABORT PRINT=1 SIGL=9 NSIG=3 MSFO=msfb54_4
$COV PRINT=E
$TABLE ID TIME DV SUR CHZ FORMAT=s1PE15.8 ONEHEADER NOPRINT FILE=sdtab4_4

```

## NONMEM control stream file for BTS study

```
:: 1. Based on: run23
:: 2. Description: SEX drgFreq OS-EXP Placebo. STUDY4
```

```
$PROBLEM EXP_MODEL HIV_SURVIVAL PLACEBO
```

```
$INPUT ID STD=DROP STPD=DROP SIT=DROP PRODUCT SEX EDY AGE BLC=DROP BLCRCL=DROP
WT=DROP DG3M=DROP DGFR HET3=DROP HETS=DROP LIV=DROP PART=DROP PARTC=DROP
CASSE=DROP CASCON=DROP ANA3=DROP ANAF=DROP ANAF2=DROP MSM=DROP RECE=DROP
ANC=DROP HIVPD=DROP POSAT=DROP HIV_FIN HIV_LA=DROP ADH=DROP PTD=DROP
PBTID=DROP PKD=DROP PLASM1=DROP PLASM2=DROP PLASM3=DROP PBMC1=DROP PBMC2=DROP
PBMC3=DROP TIS1=DROP TIS2=DROP TIS3=DROP WK=DROP TIME DV EVID FLAG_SIMUL
```

```
$DATA placebo_bangkok_NM.csv
IGNORE (FLAG_SIMUL.EQ.1)
```

```
$SUBROUTINE ADVAN13 TOL=9
$MODEL
COMP (HAZ)
```

```
::time-date (weeks!)
::dv- hiv
:: Data for estimation FLAG_SIMUL=0
:: Data for simulation FLAG=0 + FLAG=1
```

```
$PK
;;; BASESEX-DEFINITION START
IF(SEX.EQ.2) BASESEX = 1 ; Most common MALE
IF(SEX.EQ.1) BASESEX = ( 1 + THETA(2)) ;FEMALE
;;; BASESEX-DEFINITION END
```

```
;;; BASEDGFR-DEFINITION START
IF(DGFR.EQ.-99) BASEDGFR = 1 ; Missing data
IF(DGFR.EQ.2) BASEDGFR = 1 ; Most common
IF(DGFR.EQ.1) BASEDGFR = 1
IF(DGFR.EQ.3) BASEDGFR = ( 1 + THETA(3)) ;DRUG INJECTION DAILY
;;; BASEDGFR-DEFINITION END
```

```
;;; BASE-RELATION START
BASECOV=BASESEX*BASEDGFR
;;; BASE-RELATION END
```

```
;-----DROPOUT MODEL-----
A_0(1)=0
TVBASE=THETA(1)
TVBASE = BASECOV*TVBASE
BASE=TVBASE*EXP(ETA(1))
```

```
$DES
;-----DROPOUT MODEL-----
DEL=1E-6
DADT(1)=BASE
```

```
$ERROR
;-----DROPOUT MODEL-----
CHZ = A(1) ;cumulative hazard
```

```
SUR = EXP(-CHZ)      ;survival probability
DEL2=1E-6
HAZNOW=BASE
```

```
IF (DV.EQ.0) Y=SUR
IF (DV.EQ.1) Y=SUR*HAZNOW
```

```
$THETA
(0, 0.00064)      ; BASE
(-1, 1.76,5)      ; BASESEX1
(-1,1)            ; BASEDGFR2
$OMEGA 0 FIX ;    BASE
```

```
$ESTIMATION METHOD=0 LIKE MAXEVAL=9900 NOABORT PRINT=1 SIGL=9 NSIG=3 MSFO=msfb525
$COV PRINT=E
$TABLE ID TIME DV SUR CHZ FORMAT=s1PE15.8 ONEHEADER NOPRINT FILE=sdtab25
```

NONMEM control stream file for TDF2 study

;; 2. Description: OS-EXP. BASE MODEL. Placebo. STUDY5

\$PROBLEM EXP\_MODEL HIV\_SURVIVAL PLACEBO

\$INPUT ID SIT RACE AGE MAR EDU NPAR NVAG NCOND GON CLAM SYP TRI WGT BLCRT CRCL  
SEX STDA=DROP HIVP=DROP HIVFIN PSDA=DROP STDA=DROP GONN=DROP GONND=DROP  
CLAMM=DROP CLAMMD=DROP SYPP=DROP SYPPD=DROP TRII=DROP TRIID=DROP PIAD=DROP  
PRODUCT PKD=DROP PTFVL=DROP PTFVM=DROP PTFVLM=DROP PTFVL=DROP PTFVM=DROP  
PTFVLM=DROP TTFVL=DROP TTFVM=DROP TTFVLM=DROP WTE=DROP DV TIME EVID  
FLAG\_SIMUL

\$DATA placebo\_tdf2\_NM.csv  
IGNORE (FLAG\_SIMUL.EQ.1)

\$SUBROUTINE ADVAN13 TOL=9  
\$MODEL  
COMP (HAZ)

;;time-date (weeks!)  
;;dv- hiv  
;; Data for estimation FLAG\_SIMUL=0  
;; Data for simulation FLAG=0 + FLAG=1

\$PK

;------DROPOUT MODEL-----  
A\_0(1)=0  
BASE=THETA(1)\*EXP(ETA(1))

\$DES  
;------DROPOUT MODEL-----  
DEL=1E-6  
DADT(1)=BASE

\$ERROR  
;------DROPOUT MODEL-----  
CHZ = A(1) ;cumulative hazard  
SUR = EXP(-CHZ) ;survival probability  
DEL2=1E-6  
HAZNOW=BASE

IF (DV.EQ.0) Y=SUR  
IF (DV.EQ.1) Y=SUR\*HAZNOW

\$THETA  
(0, 0.00068) ; BASE

\$OMEGA 0 FIX ; BASE

\$ESTIMATION METHOD=0 LIKE MAXEVAL=9900 NOABORT PRINT=1 SIGL=9 NSIG=3  
MSFO=msfb51\_td  
\$COV PRINT=E  
\$TABLE ID TIME DV SUR CHZ FORMAT=s1PE15.8 ONEHEADER NOPRINT FILE=sdtab1\_td
